# Supplementary material for: A Critical Study on DNA Probes Attached to Microplate for CRISPR/Cas12 Trans-Cleavage Activity
Source: Biosensors (Basel). 2023 Aug 17;13(8):824. doi: 10.3390/bios13080824 (PMC10452489; doi:10.3390/bios13080824)
Supplement: Supplementary file 1 [file biosensors-13-00824-s001.zip › SM-2_TableS2_ANOVA statistic.xlsx]

## Sheet: Figure 5A
Brown-Forsythe and Welch ANOVA test
Number of families	1
Number of comparisons per family	36
Alpha	0.05
Games-Howell's multiple comparisons test	Mean Diff,	95,00% CI of diff,	Significant?	Summary	Adjusted P Value
10 vs. 15	7.98	-3,275 to 19,24	No	ns	0.1466
10 vs. 20	6.08	-3,836 to 16,00	No	ns	0.2146
10 vs. 25	18.08	-10,68 to 46,84	No	ns	0.1457
10 vs. 30	7.88	-2,230 to 17,99	No	ns	0.1109
10 vs. 50	20.34	9,113 to 31,57	Yes	**	0.0059
10 vs. 82	18.04	-1,519 to 37,60	No	ns	0.0622
10 vs. 120	22.67	10,81 to 34,53	Yes	**	0.005
10 vs. 145	27.13	2,391 to 51,87	Yes	*	0.0396
15 vs. 20	-1.9	-12,76 to 8,963	No	ns	0.9673
15 vs. 25	10.1	-17,87 to 38,07	No	ns	0.4448
15 vs. 30	-0.1	-11,06 to 10,86	No	ns	>0,9999
15 vs. 50	12.36	0,6200 to 24,10	Yes	*	0.042
15 vs. 82	10.06	-9,081 to 29,20	No	ns	0.2624
15 vs. 120	14.69	2,446 to 26,93	Yes	*	0.0267
15 vs. 145	19.15	-4,923 to 43,22	No	ns	0.0901
20 vs. 25	12	-18,05 to 42,05	No	ns	0.3306
20 vs. 30	1.8	-7,383 to 10,98	No	ns	0.955
20 vs. 50	14.26	3,435 to 25,09	Yes	*	0.0201
20 vs. 82	11.96	-8,503 to 32,42	No	ns	0.1794
20 vs. 120	16.59	4,939 to 28,24	Yes	*	0.0159
20 vs. 145	21.05	-4,873 to 46,97	No	ns	0.081
25 vs. 30	-10.2	-39,75 to 19,35	No	ns	0.4313
25 vs. 50	2.26	-25,74 to 30,26	No	ns	0.9981
25 vs. 82	-0.04	-25,59 to 25,51	No	ns	>0,9999
25 vs. 120	4.59	-22,86 to 32,04	No	ns	0.9261
25 vs. 145	9.05	-17,34 to 35,44	No	ns	0.6647
30 vs. 50	12.46	1,539 to 23,38	Yes	*	0.0322
30 vs. 82	10.16	-9,926 to 30,25	No	ns	0.2526
30 vs. 120	14.79	3,116 to 26,46	Yes	*	0.0229
30 vs. 145	19.25	-6,205 to 44,71	No	ns	0.0967
50 vs. 82	-2.3	-21,45 to 16,85	No	ns	0.9918
50 vs. 120	2.33	-9,896 to 14,56	No	ns	0.9606
50 vs. 145	6.79	-17,31 to 30,89	No	ns	0.6585
82 vs. 120	4.63	-14,30 to 23,56	No	ns	0.8261
82 vs. 145	9.09	-13,92 to 32,10	No	ns	0.5382
120 vs. 145	4.46	-19,20 to 28,12	No	ns	0.9055
Test details	Mean 1	Mean 2	Mean Diff,	SE of diff,	n1	n2	t	DF
10 vs. 15	42.41	34.43	7.98	2.081	3	3	3.835	3.956
10 vs. 20	42.41	36.33	6.08	1.812	3	3	3.356	3.875
10 vs. 25	42.41	24.33	18.08	3.9	3	3	4.636	2.571
10 vs. 30	42.41	34.53	7.88	1.868	3	3	4.217	3.953
10 vs. 50	42.41	22.07	20.34	2.077	3	3	9.795	3.959
10 vs. 82	42.41	24.37	18.04	3.019	3	3	5.976	3.006
10 vs. 120	42.41	19.74	22.67	2.168	3	3	10.46	3.879
10 vs. 145	42.41	15.28	27.13	3.52	3	3	7.708	2.716
15 vs. 20	34.43	36.33	-1.9	1.934	3	3	0.9824	3.709
15 vs. 25	34.43	24.33	10.1	3.958	3	3	2.552	2.699
15 vs. 30	34.43	34.53	-0.1	1.987	3	3	0.05032	3.827
15 vs. 50	34.43	22.07	12.36	2.184	3	3	5.659	4
15 vs. 82	34.43	24.37	10.06	3.094	3	3	3.252	3.201
15 vs. 120	34.43	19.74	14.69	2.271	3	3	6.468	3.979
15 vs. 145	34.43	15.28	19.15	3.584	3	3	5.343	2.87
20 vs. 25	36.33	24.33	12	3.823	3	3	3.139	2.402
20 vs. 30	36.33	34.53	1.8	1.703	3	3	1.057	3.979
20 vs. 50	36.33	22.07	14.26	1.93	3	3	7.39	3.716
20 vs. 82	36.33	24.37	11.96	2.919	3	3	4.097	2.725
20 vs. 120	36.33	19.74	16.59	2.028	3	3	8.182	3.575
20 vs. 145	36.33	15.28	21.05	3.435	3	3	6.128	2.507
25 vs. 30	24.33	34.53	-10.2	3.851	3	3	2.649	2.462
25 vs. 50	24.33	22.07	2.26	3.956	3	3	0.5713	2.694
25 vs. 82	24.33	24.37	-0.04	4.522	3	3	0.008846	3.674
25 vs. 120	24.33	19.74	4.59	4.005	3	3	1.146	2.799
25 vs. 145	24.33	15.28	9.05	4.871	3	3	1.858	3.944
30 vs. 50	34.53	22.07	12.46	1.983	3	3	6.284	3.833
30 vs. 82	34.53	24.37	10.16	2.955	3	3	3.438	2.828
30 vs. 120	34.53	19.74	14.79	2.078	3	3	7.116	3.709
30 vs. 145	34.53	15.28	19.25	3.465	3	3	5.555	2.582
50 vs. 82	22.07	24.37	-2.3	3.091	3	3	0.7442	3.194
50 vs. 120	22.07	19.74	2.33	2.267	3	3	1.028	3.977
50 vs. 145	22.07	15.28	6.79	3.582	3	3	1.896	2.865
82 vs. 120	24.37	19.74	4.63	3.153	3	3	1.468	3.342
82 vs. 145	24.37	15.28	9.09	4.199	3	3	2.165	3.866
120 vs. 145	19.74	15.28	4.46	3.636	3	3	1.227	2.989

## Sheet: Figure 5B
Brown-Forsythe and Welch ANOVA test
Number of families	1
Number of comparisons per family	21
Alpha	0.05
Games-Howell's multiple comparisons test	Mean Diff,	95,00% CI of diff,	Significant?	Summary	Adjusted P Value
0 vs. 20	16.77	0,8754 to 32,66	Yes	*	0.0433	A-B
0 vs. 40	17.8	6,283 to 29,32	Yes	*	0.0125	A-C
0 vs. 80	14.52	1,600 to 27,44	Yes	*	0.0355	A-D
0 vs. 160	25.86	14,11 to 37,61	Yes	**	0.0039	A-E
0 vs. 300	21.8	9,680 to 33,92	Yes	**	0.0079	A-F
0 vs. 1000	33.53	13,29 to 53,77	Yes	*	0.0138	A-G
20 vs. 40	1.03	-14,23 to 16,29	No	ns	0.9996	B-C
20 vs. 80	-2.25	-17,77 to 13,27	No	ns	0.981	B-D
20 vs. 160	9.09	-6,201 to 24,38	No	ns	0.2218	B-E
20 vs. 300	5.03	-10,32 to 20,38	No	ns	0.6587	B-F
20 vs. 1000	16.76	-2,001 to 35,52	No	ns	0.0717	B-G
40 vs. 80	-3.28	-16,57 to 10,01	No	ns	0.8507	C-D
40 vs. 160	8.06	-4,566 to 20,69	No	ns	0.1938	C-E
40 vs. 300	4	-8,825 to 16,83	No	ns	0.7138	C-F
40 vs. 1000	15.73	-2,878 to 34,34	No	ns	0.0811	C-G
80 vs. 160	11.34	-2,040 to 24,72	No	ns	0.0852	D-E
80 vs. 300	7.28	-6,248 to 20,81	No	ns	0.294	D-F
80 vs. 1000	19.01	0,5335 to 37,49	Yes	*	0.0458	D-G
160 vs. 300	-4.06	-16,99 to 8,875	No	ns	0.7098	E-F
160 vs. 1000	7.67	-10,90 to 26,24	No	ns	0.4329	E-G
300 vs. 1000	11.73	-6,795 to 30,25	No	ns	0.1776	F-G
Test details	Mean 1	Mean 2	Mean Diff,	SE of diff,	n1	n2	t	DF
0 vs. 20	45.04	28.27	16.77	2.629	3	3	6.38	2.966
0 vs. 40	45.04	27.24	17.8	2.135	3	3	8.339	3.497
0 vs. 80	45.04	30.52	14.52	2.3	3	3	6.313	3.288
0 vs. 160	45.04	19.18	25.86	2.163	3	3	11.95	3.459
0 vs. 300	45.04	23.24	21.8	2.207	3	3	9.878	3.402
0 vs. 1000	45.04	11.51	33.53	3.085	3	3	10.87	2.678
20 vs. 40	28.27	27.24	1.03	2.939	3	3	0.3505	3.724
20 vs. 80	28.27	30.52	-2.25	3.061	3	3	0.735	3.884
20 vs. 160	28.27	19.18	9.09	2.96	3	3	3.071	3.757
20 vs. 300	28.27	23.24	5.03	2.992	3	3	1.681	3.803
20 vs. 1000	28.27	11.51	16.76	3.687	3	3	4.545	3.858
40 vs. 80	27.24	30.52	-3.28	2.649	3	3	1.238	3.957
40 vs. 160	27.24	19.18	8.06	2.531	3	3	3.184	3.999
40 vs. 300	27.24	23.24	4	2.569	3	3	1.557	3.991
40 vs. 1000	27.24	11.51	15.73	3.353	3	3	4.691	3.348
80 vs. 160	30.52	19.18	11.34	2.672	3	3	4.243	3.971
80 vs. 300	30.52	23.24	7.28	2.708	3	3	2.689	3.987
80 vs. 1000	30.52	11.51	19.01	3.461	3	3	5.493	3.557
160 vs. 300	19.18	23.24	-4.06	2.593	3	3	1.566	3.997
160 vs. 1000	19.18	11.51	7.67	3.372	3	3	2.275	3.387
300 vs. 1000	23.24	11.51	11.73	3.4	3	3	3.45	3.444

## Sheet: Figure 6A
Two-way ANOVA
Within each column, compare rows (simple effects within columns)
Number of families	2
Number of comparisons per family	45
Alpha	0.05
Tukey's multiple comparisons test	Mean Diff,	95,00% CI of diff,	Significant?	Summary	Adjusted P Value
+ Cis
10 vs. 15	-312	-988,7 to 364,7	No	ns	0.8661
10 vs. 20	-3663	-4340 to -2986	Yes	****	<0,0001
10 vs. 25	-2023	-2700 to -1346	Yes	****	<0,0001
10 vs. 30	-4991	-5668 to -4314	Yes	****	<0,0001
10 vs. 50	-2143	-2820 to -1466	Yes	****	<0,0001
10 vs. 82	-997	-1674 to -320,3	Yes	***	0.0006
10 vs. 120	-2197	-2874 to -1520	Yes	****	<0,0001
10 vs. 145	-2169	-2846 to -1492	Yes	****	<0,0001
10 vs. PBST	890	213,3 to 1567	Yes	**	0.0028
15 vs. 20	-3351	-4028 to -2674	Yes	****	<0,0001
15 vs. 25	-1711	-2388 to -1034	Yes	****	<0,0001
15 vs. 30	-4679	-5356 to -4002	Yes	****	<0,0001
15 vs. 50	-1831	-2508 to -1154	Yes	****	<0,0001
15 vs. 82	-685	-1362 to -8,259	Yes	*	0.0452
15 vs. 120	-1885	-2562 to -1208	Yes	****	<0,0001
15 vs. 145	-1857	-2534 to -1180	Yes	****	<0,0001
15 vs. PBST	1202	525,3 to 1879	Yes	****	<0,0001
20 vs. 25	1640	963,3 to 2317	Yes	****	<0,0001
20 vs. 30	-1328	-2005 to -651,3	Yes	****	<0,0001
20 vs. 50	1520	843,3 to 2197	Yes	****	<0,0001
20 vs. 82	2666	1989 to 3343	Yes	****	<0,0001
20 vs. 120	1466	789,3 to 2143	Yes	****	<0,0001
20 vs. 145	1494	817,3 to 2171	Yes	****	<0,0001
20 vs. PBST	4553	3876 to 5230	Yes	****	<0,0001
25 vs. 30	-2968	-3645 to -2291	Yes	****	<0,0001
25 vs. 50	-120	-796,7 to 556,7	No	ns	0.9998
25 vs. 82	1026	349,3 to 1703	Yes	***	0.0004
25 vs. 120	-174	-850,7 to 502,7	No	ns	0.9968
25 vs. 145	-146	-822,7 to 530,7	No	ns	0.9992
25 vs. PBST	2913	2236 to 3590	Yes	****	<0,0001
30 vs. 50	2848	2171 to 3525	Yes	****	<0,0001
30 vs. 82	3994	3317 to 4671	Yes	****	<0,0001
30 vs. 120	2794	2117 to 3471	Yes	****	<0,0001
30 vs. 145	2822	2145 to 3499	Yes	****	<0,0001
30 vs. PBST	5881	5204 to 6558	Yes	****	<0,0001
50 vs. 82	1146	469,3 to 1823	Yes	****	<0,0001
50 vs. 120	-54	-730,7 to 622,7	No	ns	>0,9999
50 vs. 145	-26	-702,7 to 650,7	No	ns	>0,9999
50 vs. PBST	3033	2356 to 3710	Yes	****	<0,0001
82 vs. 120	-1200	-1877 to -523,3	Yes	****	<0,0001
82 vs. 145	-1172	-1849 to -495,3	Yes	****	<0,0001
82 vs. PBST	1887	1210 to 2564	Yes	****	<0,0001
120 vs. 145	28	-648,7 to 704,7	No	ns	>0,9999
120 vs. PBST	3087	2410 to 3764	Yes	****	<0,0001
145 vs. PBST	3059	2382 to 3736	Yes	****	<0,0001
- Cis
10 vs. 15	-44	-720,7 to 632,7	No	ns	>0,9999
10 vs. 20	-534	-1211 to 142,7	No	ns	0.2325
10 vs. 25	58	-618,7 to 734,7	No	ns	>0,9999
10 vs. 30	-496	-1173 to 180,7	No	ns	0.3234
10 vs. 50	154	-522,7 to 830,7	No	ns	0.9988
10 vs. 82	448	-228,7 to 1125	No	ns	0.463
10 vs. 120	396	-280,7 to 1073	No	ns	0.6308
10 vs. 145	606	-70,74 to 1283	No	ns	0.1129
10 vs. PBST	779	102,3 to 1456	Yes	*	0.0134
15 vs. 20	-490	-1167 to 186,7	No	ns	0.3394
15 vs. 25	102	-574,7 to 778,7	No	ns	>0,9999
15 vs. 30	-452	-1129 to 224,7	No	ns	0.4505
15 vs. 50	198	-478,7 to 874,7	No	ns	0.9919
15 vs. 82	492	-184,7 to 1169	No	ns	0.334
15 vs. 120	440	-236,7 to 1117	No	ns	0.4883
15 vs. 145	650	-26,74 to 1327	No	ns	0.0688
15 vs. PBST	823	146,3 to 1500	Yes	**	0.0073
20 vs. 25	592	-84,74 to 1269	No	ns	0.1311
20 vs. 30	38	-638,7 to 714,7	No	ns	>0,9999
20 vs. 50	688	11,26 to 1365	Yes	*	0.0436
20 vs. 82	982	305,3 to 1659	Yes	***	0.0007
20 vs. 120	930	253,3 to 1607	Yes	**	0.0015
20 vs. 145	1140	463,3 to 1817	Yes	****	<0,0001
20 vs. PBST	1313	636,3 to 1990	Yes	****	<0,0001
25 vs. 30	-554	-1231 to 122,7	No	ns	0.1925
25 vs. 50	96	-580,7 to 772,7	No	ns	>0,9999
25 vs. 82	390	-286,7 to 1067	No	ns	0.6501
25 vs. 120	338	-338,7 to 1015	No	ns	0.8039
25 vs. 145	548	-128,7 to 1225	No	ns	0.2039
25 vs. PBST	721	44,26 to 1398	Yes	*	0.0288
30 vs. 50	650	-26,74 to 1327	No	ns	0.0688
30 vs. 82	944	267,3 to 1621	Yes	**	0.0013
30 vs. 120	892	215,3 to 1569	Yes	**	0.0027
30 vs. 145	1102	425,3 to 1779	Yes	***	0.0001
30 vs. PBST	1275	598,3 to 1952	Yes	****	<0,0001
50 vs. 82	294	-382,7 to 970,7	No	ns	0.9016
50 vs. 120	242	-434,7 to 918,7	No	ns	0.9686
50 vs. 145	452	-224,7 to 1129	No	ns	0.4505
50 vs. PBST	625	-51,74 to 1302	No	ns	0.0915
82 vs. 120	-52	-728,7 to 624,7	No	ns	>0,9999
82 vs. 145	158	-518,7 to 834,7	No	ns	0.9985
82 vs. PBST	331	-345,7 to 1008	No	ns	0.8219
120 vs. 145	210	-466,7 to 886,7	No	ns	0.9877
120 vs. PBST	383	-293,7 to 1060	No	ns	0.6724
145 vs. PBST	173	-503,7 to 849,7	No	ns	0.997
Test details	Mean 1	Mean 2	Mean Diff,	SE of diff,	N1	N2	q	DF
+ Cis
10 vs. 15	1518	1830	-312	202.1	1	1	2.183	40
10 vs. 20	1518	5181	-3663	202.1	1	1	25.63	40
10 vs. 25	1518	3541	-2023	202.1	1	1	14.15	40
10 vs. 30	1518	6509	-4991	202.1	1	1	34.92	40
10 vs. 50	1518	3661	-2143	202.1	1	1	14.99	40
10 vs. 82	1518	2515	-997	202.1	1	1	6.975	40
10 vs. 120	1518	3715	-2197	202.1	1	1	15.37	40
10 vs. 145	1518	3687	-2169	202.1	1	1	15.17	40
10 vs. PBST	1518	628	890	202.1	1	1	6.226	40
15 vs. 20	1830	5181	-3351	202.1	1	1	23.44	40
15 vs. 25	1830	3541	-1711	202.1	1	1	11.97	40
15 vs. 30	1830	6509	-4679	202.1	1	1	32.73	40
15 vs. 50	1830	3661	-1831	202.1	1	1	12.81	40
15 vs. 82	1830	2515	-685	202.1	1	1	4.792	40
15 vs. 120	1830	3715	-1885	202.1	1	1	13.19	40
15 vs. 145	1830	3687	-1857	202.1	1	1	12.99	40
15 vs. PBST	1830	628	1202	202.1	1	1	8.409	40
20 vs. 25	5181	3541	1640	202.1	1	1	11.47	40
20 vs. 30	5181	6509	-1328	202.1	1	1	9.291	40
20 vs. 50	5181	3661	1520	202.1	1	1	10.63	40
20 vs. 82	5181	2515	2666	202.1	1	1	18.65	40
20 vs. 120	5181	3715	1466	202.1	1	1	10.26	40
20 vs. 145	5181	3687	1494	202.1	1	1	10.45	40
20 vs. PBST	5181	628	4553	202.1	1	1	31.85	40
25 vs. 30	3541	6509	-2968	202.1	1	1	20.76	40
25 vs. 50	3541	3661	-120	202.1	1	1	0.8395	40
25 vs. 82	3541	2515	1026	202.1	1	1	7.178	40
25 vs. 120	3541	3715	-174	202.1	1	1	1.217	40
25 vs. 145	3541	3687	-146	202.1	1	1	1.021	40
25 vs. PBST	3541	628	2913	202.1	1	1	20.38	40
30 vs. 50	6509	3661	2848	202.1	1	1	19.92	40
30 vs. 82	6509	2515	3994	202.1	1	1	27.94	40
30 vs. 120	6509	3715	2794	202.1	1	1	19.55	40
30 vs. 145	6509	3687	2822	202.1	1	1	19.74	40
30 vs. PBST	6509	628	5881	202.1	1	1	41.14	40
50 vs. 82	3661	2515	1146	202.1	1	1	8.017	40
50 vs. 120	3661	3715	-54	202.1	1	1	0.3778	40
50 vs. 145	3661	3687	-26	202.1	1	1	0.1819	40
50 vs. PBST	3661	628	3033	202.1	1	1	21.22	40
82 vs. 120	2515	3715	-1200	202.1	1	1	8.395	40
82 vs. 145	2515	3687	-1172	202.1	1	1	8.199	40
82 vs. PBST	2515	628	1887	202.1	1	1	13.2	40
120 vs. 145	3715	3687	28	202.1	1	1	0.1959	40
120 vs. PBST	3715	628	3087	202.1	1	1	21.6	40
145 vs. PBST	3687	628	3059	202.1	1	1	21.4	40
- Cis
10 vs. 15	1426	1470	-44	202.1	1	1	0.3078	40
10 vs. 20	1426	1960	-534	202.1	1	1	3.736	40
10 vs. 25	1426	1368	58	202.1	1	1	0.4058	40
10 vs. 30	1426	1922	-496	202.1	1	1	3.47	40
10 vs. 50	1426	1272	154	202.1	1	1	1.077	40
10 vs. 82	1426	978	448	202.1	1	1	3.134	40
10 vs. 120	1426	1030	396	202.1	1	1	2.77	40
10 vs. 145	1426	820	606	202.1	1	1	4.24	40
10 vs. PBST	1426	647	779	202.1	1	1	5.45	40
15 vs. 20	1470	1960	-490	202.1	1	1	3.428	40
15 vs. 25	1470	1368	102	202.1	1	1	0.7136	40
15 vs. 30	1470	1922	-452	202.1	1	1	3.162	40
15 vs. 50	1470	1272	198	202.1	1	1	1.385	40
15 vs. 82	1470	978	492	202.1	1	1	3.442	40
15 vs. 120	1470	1030	440	202.1	1	1	3.078	40
15 vs. 145	1470	820	650	202.1	1	1	4.547	40
15 vs. PBST	1470	647	823	202.1	1	1	5.758	40
20 vs. 25	1960	1368	592	202.1	1	1	4.142	40
20 vs. 30	1960	1922	38	202.1	1	1	0.2658	40
20 vs. 50	1960	1272	688	202.1	1	1	4.813	40
20 vs. 82	1960	978	982	202.1	1	1	6.87	40
20 vs. 120	1960	1030	930	202.1	1	1	6.506	40
20 vs. 145	1960	820	1140	202.1	1	1	7.975	40
20 vs. PBST	1960	647	1313	202.1	1	1	9.186	40
25 vs. 30	1368	1922	-554	202.1	1	1	3.876	40
25 vs. 50	1368	1272	96	202.1	1	1	0.6716	40
25 vs. 82	1368	978	390	202.1	1	1	2.728	40
25 vs. 120	1368	1030	338	202.1	1	1	2.365	40
25 vs. 145	1368	820	548	202.1	1	1	3.834	40
25 vs. PBST	1368	647	721	202.1	1	1	5.044	40
30 vs. 50	1922	1272	650	202.1	1	1	4.547	40
30 vs. 82	1922	978	944	202.1	1	1	6.604	40
30 vs. 120	1922	1030	892	202.1	1	1	6.24	40
30 vs. 145	1922	820	1102	202.1	1	1	7.71	40
30 vs. PBST	1922	647	1275	202.1	1	1	8.92	40
50 vs. 82	1272	978	294	202.1	1	1	2.057	40
50 vs. 120	1272	1030	242	202.1	1	1	1.693	40
50 vs. 145	1272	820	452	202.1	1	1	3.162	40
50 vs. PBST	1272	647	625	202.1	1	1	4.373	40
82 vs. 120	978	1030	-52	202.1	1	1	0.3638	40
82 vs. 145	978	820	158	202.1	1	1	1.105	40
82 vs. PBST	978	647	331	202.1	1	1	2.316	40
120 vs. 145	1030	820	210	202.1	1	1	1.469	40
120 vs. PBST	1030	647	383	202.1	1	1	2.679	40
145 vs. PBST	820	647	173	202.1	1	1	1.21	40

## Sheet: Figure 6B
Two-way ANOVA
Within each column, compare rows (simple effects within columns)
Number of families	2
Number of comparisons per family	36
Alpha	0.05
Tukey's multiple comparisons test	Mean Diff,	95,00% CI of diff,	Significant?	Summary	Adjusted P Value
+ Cis
10 vs. 15	-3.639	-26,38 to 19,10	No	ns	0.9998
10 vs. 20	-11.96	-34,69 to 10,78	No	ns	0.7224
10 vs. 25	-19.97	-42,71 to 2,766	No	ns	0.1235
10 vs. 30	-17.85	-40,59 to 4,883	No	ns	0.2265
10 vs. 50	-29.14	-51,88 to -6,403	Yes	**	0.0044
10 vs. 82	-22.78	-45,52 to -0,04589	Yes	*	0.0492
10 vs. 120	-42.8	-65,54 to -20,06	Yes	****	<0,0001
10 vs. 145	-62.26	-84,99 to -39,52	Yes	****	<0,0001
15 vs. 20	-8.318	-31,06 to 14,42	No	ns	0.9499
15 vs. 25	-16.33	-39,07 to 6,405	No	ns	0.3311
15 vs. 30	-14.22	-36,95 to 8,522	No	ns	0.5137
15 vs. 50	-25.5	-48,24 to -2,764	Yes	*	0.0183
15 vs. 82	-19.14	-41,88 to 3,593	No	ns	0.1581
15 vs. 120	-39.16	-61,90 to -16,43	Yes	****	<0,0001
15 vs. 145	-58.62	-81,35 to -35,88	Yes	****	<0,0001
20 vs. 25	-8.015	-30,75 to 14,72	No	ns	0.9594
20 vs. 30	-5.897	-28,63 to 16,84	No	ns	0.994
20 vs. 50	-17.18	-39,92 to 5,554	No	ns	0.2694
20 vs. 82	-10.83	-33,56 to 11,91	No	ns	0.8142
20 vs. 120	-30.84	-53,58 to -8,107	Yes	**	0.0022
20 vs. 145	-50.3	-73,04 to -27,56	Yes	****	<0,0001
25 vs. 30	2.118	-20,62 to 24,85	No	ns	>0,9999
25 vs. 50	-9.169	-31,91 to 13,57	No	ns	0.9155
25 vs. 82	-2.812	-25,55 to 19,93	No	ns	>0,9999
25 vs. 120	-22.83	-45,57 to -0,09268	Yes	*	0.0484
25 vs. 145	-42.28	-65,02 to -19,55	Yes	****	<0,0001
30 vs. 50	-11.29	-34,02 to 11,45	No	ns	0.7787
30 vs. 82	-4.929	-27,67 to 17,81	No	ns	0.9982
30 vs. 120	-24.95	-47,68 to -2,210	Yes	*	0.0226
30 vs. 145	-44.4	-67,14 to -21,66	Yes	****	<0,0001
50 vs. 82	6.358	-16,38 to 29,09	No	ns	0.9902
50 vs. 120	-13.66	-36,40 to 9,076	No	ns	0.5656
50 vs. 145	-33.11	-55,85 to -10,38	Yes	***	0.0008
82 vs. 120	-20.02	-42,76 to 2,719	No	ns	0.1218
82 vs. 145	-39.47	-62,21 to -16,73	Yes	****	<0,0001
120 vs. 145	-19.45	-42,19 to 3,284	No	ns	0.1444
- Cis
10 vs. 15	-2.205	-24,94 to 20,53	No	ns	>0,9999
10 vs. 20	-1.577	-24,31 to 21,16	No	ns	>0,9999
10 vs. 25	-4.813	-27,55 to 17,92	No	ns	0.9985
10 vs. 30	-1.891	-24,63 to 20,85	No	ns	>0,9999
10 vs. 50	-7.016	-29,75 to 15,72	No	ns	0.9816
10 vs. 82	-5.975	-28,71 to 16,76	No	ns	0.9934
10 vs. 120	-8.388	-31,12 to 14,35	No	ns	0.9475
10 vs. 145	-10.08	-32,82 to 12,65	No	ns	0.8651
15 vs. 20	0.628	-22,11 to 23,37	No	ns	>0,9999
15 vs. 25	-2.608	-25,35 to 20,13	No	ns	>0,9999
15 vs. 30	0.3142	-22,42 to 23,05	No	ns	>0,9999
15 vs. 50	-4.811	-27,55 to 17,93	No	ns	0.9985
15 vs. 82	-3.77	-26,51 to 18,97	No	ns	0.9997
15 vs. 120	-6.183	-28,92 to 16,55	No	ns	0.9918
15 vs. 145	-7.879	-30,62 to 14,86	No	ns	0.9632
20 vs. 25	-3.236	-25,97 to 19,50	No	ns	>0,9999
20 vs. 30	-0.3138	-23,05 to 22,42	No	ns	>0,9999
20 vs. 50	-5.439	-28,18 to 17,30	No	ns	0.9965
20 vs. 82	-4.398	-27,14 to 18,34	No	ns	0.9992
20 vs. 120	-6.811	-29,55 to 15,93	No	ns	0.9847
20 vs. 145	-8.507	-31,24 to 14,23	No	ns	0.9433
25 vs. 30	2.922	-19,82 to 25,66	No	ns	>0,9999
25 vs. 50	-2.203	-24,94 to 20,53	No	ns	>0,9999
25 vs. 82	-1.162	-23,90 to 21,57	No	ns	>0,9999
25 vs. 120	-3.575	-26,31 to 19,16	No	ns	0.9998
25 vs. 145	-5.271	-28,01 to 17,47	No	ns	0.9972
30 vs. 50	-5.125	-27,86 to 17,61	No	ns	0.9977
30 vs. 82	-4.085	-26,82 to 18,65	No	ns	0.9995
30 vs. 120	-6.497	-29,23 to 16,24	No	ns	0.9887
30 vs. 145	-8.194	-30,93 to 14,54	No	ns	0.954
50 vs. 82	1.041	-21,70 to 23,78	No	ns	>0,9999
50 vs. 120	-1.372	-24,11 to 21,37	No	ns	>0,9999
50 vs. 145	-3.068	-25,81 to 19,67	No	ns	>0,9999
82 vs. 120	-2.412	-25,15 to 20,33	No	ns	>0,9999
82 vs. 145	-4.109	-26,85 to 18,63	No	ns	0.9995
120 vs. 145	-1.697	-24,43 to 21,04	No	ns	>0,9999
Test details	Mean 1	Mean 2	Mean Diff,	SE of diff,	N1	N2	q	DF
+ Cis
10 vs. 15	5.247	8.886	-3.639	6.896	1	1	0.7463	36
10 vs. 20	5.247	17.2	-11.96	6.896	1	1	2.452	36
10 vs. 25	5.247	25.22	-19.97	6.896	1	1	4.096	36
10 vs. 30	5.247	23.1	-17.85	6.896	1	1	3.661	36
10 vs. 50	5.247	34.39	-29.14	6.896	1	1	5.976	36
10 vs. 82	5.247	28.03	-22.78	6.896	1	1	4.672	36
10 vs. 120	5.247	48.05	-42.8	6.896	1	1	8.777	36
10 vs. 145	5.247	67.5	-62.26	6.896	1	1	12.77	36
15 vs. 20	8.886	17.2	-8.318	6.896	1	1	1.706	36
15 vs. 25	8.886	25.22	-16.33	6.896	1	1	3.349	36
15 vs. 30	8.886	23.1	-14.22	6.896	1	1	2.915	36
15 vs. 50	8.886	34.39	-25.5	6.896	1	1	5.23	36
15 vs. 82	8.886	28.03	-19.14	6.896	1	1	3.926	36
15 vs. 120	8.886	48.05	-39.16	6.896	1	1	8.031	36
15 vs. 145	8.886	67.5	-58.62	6.896	1	1	12.02	36
20 vs. 25	17.2	25.22	-8.015	6.896	1	1	1.644	36
20 vs. 30	17.2	23.1	-5.897	6.896	1	1	1.209	36
20 vs. 50	17.2	34.39	-17.18	6.896	1	1	3.524	36
20 vs. 82	17.2	28.03	-10.83	6.896	1	1	2.22	36
20 vs. 120	17.2	48.05	-30.84	6.896	1	1	6.325	36
20 vs. 145	17.2	67.5	-50.3	6.896	1	1	10.31	36
25 vs. 30	25.22	23.1	2.118	6.896	1	1	0.4343	36
25 vs. 50	25.22	34.39	-9.169	6.896	1	1	1.88	36
25 vs. 82	25.22	28.03	-2.812	6.896	1	1	0.5766	36
25 vs. 120	25.22	48.05	-22.83	6.896	1	1	4.682	36
25 vs. 145	25.22	67.5	-42.28	6.896	1	1	8.671	36
30 vs. 50	23.1	34.39	-11.29	6.896	1	1	2.315	36
30 vs. 82	23.1	28.03	-4.929	6.896	1	1	1.011	36
30 vs. 120	23.1	48.05	-24.95	6.896	1	1	5.116	36
30 vs. 145	23.1	67.5	-44.4	6.896	1	1	9.105	36
50 vs. 82	34.39	28.03	6.358	6.896	1	1	1.304	36
50 vs. 120	34.39	48.05	-13.66	6.896	1	1	2.801	36
50 vs. 145	34.39	67.5	-33.11	6.896	1	1	6.791	36
82 vs. 120	28.03	48.05	-20.02	6.896	1	1	4.105	36
82 vs. 145	28.03	67.5	-39.47	6.896	1	1	8.095	36
120 vs. 145	48.05	67.5	-19.45	6.896	1	1	3.989	36
- Cis
10 vs. 15	4.93	7.135	-2.205	6.896	1	1	0.4522	36
10 vs. 20	4.93	6.507	-1.577	6.896	1	1	0.3234	36
10 vs. 25	4.93	9.743	-4.813	6.896	1	1	0.987	36
10 vs. 30	4.93	6.82	-1.891	6.896	1	1	0.3877	36
10 vs. 50	4.93	11.95	-7.016	6.896	1	1	1.439	36
10 vs. 82	4.93	10.91	-5.975	6.896	1	1	1.225	36
10 vs. 120	4.93	13.32	-8.388	6.896	1	1	1.72	36
10 vs. 145	4.93	15.01	-10.08	6.896	1	1	2.068	36
15 vs. 20	7.135	6.507	0.628	6.896	1	1	0.1288	36
15 vs. 25	7.135	9.743	-2.608	6.896	1	1	0.5348	36
15 vs. 30	7.135	6.82	0.3142	6.896	1	1	0.06444	36
15 vs. 50	7.135	11.95	-4.811	6.896	1	1	0.9866	36
15 vs. 82	7.135	10.91	-3.77	6.896	1	1	0.7732	36
15 vs. 120	7.135	13.32	-6.183	6.896	1	1	1.268	36
15 vs. 145	7.135	15.01	-7.879	6.896	1	1	1.616	36
20 vs. 25	6.507	9.743	-3.236	6.896	1	1	0.6636	36
20 vs. 30	6.507	6.82	-0.3138	6.896	1	1	0.06434	36
20 vs. 50	6.507	11.95	-5.439	6.896	1	1	1.115	36
20 vs. 82	6.507	10.91	-4.398	6.896	1	1	0.902	36
20 vs. 120	6.507	13.32	-6.811	6.896	1	1	1.397	36
20 vs. 145	6.507	15.01	-8.507	6.896	1	1	1.745	36
25 vs. 30	9.743	6.82	2.922	6.896	1	1	0.5993	36
25 vs. 50	9.743	11.95	-2.203	6.896	1	1	0.4518	36
25 vs. 82	9.743	10.91	-1.162	6.896	1	1	0.2384	36
25 vs. 120	9.743	13.32	-3.575	6.896	1	1	0.7331	36
25 vs. 145	9.743	15.01	-5.271	6.896	1	1	1.081	36
30 vs. 50	6.82	11.95	-5.125	6.896	1	1	1.051	36
30 vs. 82	6.82	10.91	-4.085	6.896	1	1	0.8376	36
30 vs. 120	6.82	13.32	-6.497	6.896	1	1	1.332	36
30 vs. 145	6.82	15.01	-8.194	6.896	1	1	1.68	36
50 vs. 82	11.95	10.91	1.041	6.896	1	1	0.2134	36
50 vs. 120	11.95	13.32	-1.372	6.896	1	1	0.2813	36
50 vs. 145	11.95	15.01	-3.068	6.896	1	1	0.6292	36
82 vs. 120	10.91	13.32	-2.412	6.896	1	1	0.4947	36
82 vs. 145	10.91	15.01	-4.109	6.896	1	1	0.8426	36
120 vs. 145	13.32	15.01	-1.697	6.896	1	1	0.3479	36

## Sheet: Figure 6C
Two-way ANOVA
Within each column, compare rows (simple effects within columns)
Number of families	2
Number of comparisons per family	28
Alpha	0.05
Tukey's multiple comparisons test	Mean Diff,	95,00% CI of diff,	Significant?	Summary	Adjusted P Value
+ Cis
0 vs. 20	-3246	-3802 to -2690	Yes	****	<0,0001
0 vs. 40	765	208,7 to 1321	Yes	**	0.0022
0 vs. 80	-1309	-1865 to -752,7	Yes	****	<0,0001
0 vs. 160	-1733	-2289 to -1177	Yes	****	<0,0001
0 vs. 300	-396	-952,3 to 160,3	No	ns	0.3216
0 vs. 1000	3151	2595 to 3707	Yes	****	<0,0001
0 vs. PBST	3932	3376 to 4488	Yes	****	<0,0001
20 vs. 40	4011	3455 to 4567	Yes	****	<0,0001
20 vs. 80	1937	1381 to 2493	Yes	****	<0,0001
20 vs. 160	1513	956,7 to 2069	Yes	****	<0,0001
20 vs. 300	2850	2294 to 3406	Yes	****	<0,0001
20 vs. 1000	6397	5841 to 6953	Yes	****	<0,0001
20 vs. PBST	7178	6622 to 7734	Yes	****	<0,0001
40 vs. 80	-2074	-2630 to -1518	Yes	****	<0,0001
40 vs. 160	-2498	-3054 to -1942	Yes	****	<0,0001
40 vs. 300	-1161	-1717 to -604,7	Yes	****	<0,0001
40 vs. 1000	2386	1830 to 2942	Yes	****	<0,0001
40 vs. PBST	3167	2611 to 3723	Yes	****	<0,0001
80 vs. 160	-424	-980,3 to 132,3	No	ns	0.2448
80 vs. 300	913	356,7 to 1469	Yes	***	0.0002
80 vs. 1000	4460	3904 to 5016	Yes	****	<0,0001
80 vs. PBST	5241	4685 to 5797	Yes	****	<0,0001
160 vs. 300	1337	780,7 to 1893	Yes	****	<0,0001
160 vs. 1000	4884	4328 to 5440	Yes	****	<0,0001
160 vs. PBST	5665	5109 to 6221	Yes	****	<0,0001
300 vs. 1000	3547	2991 to 4103	Yes	****	<0,0001
300 vs. PBST	4328	3772 to 4884	Yes	****	<0,0001
1000 vs. PBST	781	224,7 to 1337	Yes	**	0.0017
- Cis
0 vs. 20	150	-406,3 to 706,3	No	ns	0.9865
0 vs. 40	573	16,65 to 1129	Yes	*	0.0398
0 vs. 80	337	-219,3 to 893,3	No	ns	0.5213
0 vs. 160	242	-314,3 to 798,3	No	ns	0.8465
0 vs. 300	550	-6,348 to 1106	No	ns	0.0545
0 vs. 1000	759	202,7 to 1315	Yes	**	0.0024
0 vs. PBST	951	394,7 to 1507	Yes	***	0.0001
20 vs. 40	423	-133,3 to 979,3	No	ns	0.2473
20 vs. 80	187	-369,3 to 743,3	No	ns	0.9546
20 vs. 160	92	-464,3 to 648,3	No	ns	0.9993
20 vs. 300	400	-156,3 to 956,3	No	ns	0.3098
20 vs. 1000	609	52,65 to 1165	Yes	*	0.0239
20 vs. PBST	801	244,7 to 1357	Yes	**	0.0012
40 vs. 80	-236	-792,3 to 320,3	No	ns	0.8621
40 vs. 160	-331	-887,3 to 225,3	No	ns	0.5434
40 vs. 300	-23	-579,3 to 533,3	No	ns	>0,9999
40 vs. 1000	186	-370,3 to 742,3	No	ns	0.9559
40 vs. PBST	378	-178,3 to 934,3	No	ns	0.3778
80 vs. 160	-95	-651,3 to 461,3	No	ns	0.9992
80 vs. 300	213	-343,3 to 769,3	No	ns	0.9134
80 vs. 1000	422	-134,3 to 978,3	No	ns	0.2498
80 vs. PBST	614	57,65 to 1170	Yes	*	0.0223
160 vs. 300	308	-248,3 to 864,3	No	ns	0.6288
160 vs. 1000	517	-39,35 to 1073	No	ns	0.0838
160 vs. PBST	709	152,7 to 1265	Yes	**	0.0053
300 vs. 1000	209	-347,3 to 765,3	No	ns	0.9209
300 vs. PBST	401	-155,3 to 957,3	No	ns	0.3069
1000 vs. PBST	192	-364,3 to 748,3	No	ns	0.948
Test details	Mean 1	Mean 2	Mean Diff,	SE of diff,	N1	N2	q	DF
+ Cis
0 vs. 20	4560	7806	-3246	171.7	1	1	26.73	32
0 vs. 40	4560	3795	765	171.7	1	1	6.299	32
0 vs. 80	4560	5869	-1309	171.7	1	1	10.78	32
0 vs. 160	4560	6293	-1733	171.7	1	1	14.27	32
0 vs. 300	4560	4956	-396	171.7	1	1	3.261	32
0 vs. 1000	4560	1409	3151	171.7	1	1	25.95	32
0 vs. PBST	4560	628	3932	171.7	1	1	32.38	32
20 vs. 40	7806	3795	4011	171.7	1	1	33.03	32
20 vs. 80	7806	5869	1937	171.7	1	1	15.95	32
20 vs. 160	7806	6293	1513	171.7	1	1	12.46	32
20 vs. 300	7806	4956	2850	171.7	1	1	23.47	32
20 vs. 1000	7806	1409	6397	171.7	1	1	52.67	32
20 vs. PBST	7806	628	7178	171.7	1	1	59.1	32
40 vs. 80	3795	5869	-2074	171.7	1	1	17.08	32
40 vs. 160	3795	6293	-2498	171.7	1	1	20.57	32
40 vs. 300	3795	4956	-1161	171.7	1	1	9.56	32
40 vs. 1000	3795	1409	2386	171.7	1	1	19.65	32
40 vs. PBST	3795	628	3167	171.7	1	1	26.08	32
80 vs. 160	5869	6293	-424	171.7	1	1	3.491	32
80 vs. 300	5869	4956	913	171.7	1	1	7.518	32
80 vs. 1000	5869	1409	4460	171.7	1	1	36.72	32
80 vs. PBST	5869	628	5241	171.7	1	1	43.16	32
160 vs. 300	6293	4956	1337	171.7	1	1	11.01	32
160 vs. 1000	6293	1409	4884	171.7	1	1	40.22	32
160 vs. PBST	6293	628	5665	171.7	1	1	46.65	32
300 vs. 1000	4956	1409	3547	171.7	1	1	29.21	32
300 vs. PBST	4956	628	4328	171.7	1	1	35.64	32
1000 vs. PBST	1409	628	781	171.7	1	1	6.431	32
- Cis
0 vs. 20	1484	1334	150	171.7	1	1	1.235	32
0 vs. 40	1484	911	573	171.7	1	1	4.718	32
0 vs. 80	1484	1147	337	171.7	1	1	2.775	32
0 vs. 160	1484	1242	242	171.7	1	1	1.993	32
0 vs. 300	1484	934	550	171.7	1	1	4.529	32
0 vs. 1000	1484	725	759	171.7	1	1	6.25	32
0 vs. PBST	1484	533	951	171.7	1	1	7.831	32
20 vs. 40	1334	911	423	171.7	1	1	3.483	32
20 vs. 80	1334	1147	187	171.7	1	1	1.54	32
20 vs. 160	1334	1242	92	171.7	1	1	0.7575	32
20 vs. 300	1334	934	400	171.7	1	1	3.294	32
20 vs. 1000	1334	725	609	171.7	1	1	5.015	32
20 vs. PBST	1334	533	801	171.7	1	1	6.596	32
40 vs. 80	911	1147	-236	171.7	1	1	1.943	32
40 vs. 160	911	1242	-331	171.7	1	1	2.726	32
40 vs. 300	911	934	-23	171.7	1	1	0.1894	32
40 vs. 1000	911	725	186	171.7	1	1	1.532	32
40 vs. PBST	911	533	378	171.7	1	1	3.113	32
80 vs. 160	1147	1242	-95	171.7	1	1	0.7822	32
80 vs. 300	1147	934	213	171.7	1	1	1.754	32
80 vs. 1000	1147	725	422	171.7	1	1	3.475	32
80 vs. PBST	1147	533	614	171.7	1	1	5.056	32
160 vs. 300	1242	934	308	171.7	1	1	2.536	32
160 vs. 1000	1242	725	517	171.7	1	1	4.257	32
160 vs. PBST	1242	533	709	171.7	1	1	5.838	32
300 vs. 1000	934	725	209	171.7	1	1	1.721	32
300 vs. PBST	934	533	401	171.7	1	1	3.302	32
1000 vs. PBST	725	533	192	171.7	1	1	1.581	32

## Sheet: Figure 6D
Two-way ANOVA
Within each column, compare rows (simple effects within columns)
Number of families	2
Number of comparisons per family	21
Alpha	0.05
Tukey's multiple comparisons test	Mean Diff,	95,00% CI of diff,	Significant?	Summary	Adjusted P Value
+ Cis
0 vs. 20	-10.23	-26,42 to 5,956	No	ns	0.4339
0 vs. 40	-29.41	-45,60 to -13,22	Yes	****	<0,0001
0 vs. 80	-23.08	-39,27 to -6,894	Yes	**	0.0018
0 vs. 160	-41.02	-57,21 to -24,83	Yes	****	<0,0001
0 vs. 300	-20.14	-36,33 to -3,954	Yes	**	0.0078
0 vs. 1000	-10.62	-26,81 to 5,566	No	ns	0.3903
20 vs. 40	-19.18	-35,37 to -2,994	Yes	*	0.0125
20 vs. 80	-12.85	-29,04 to 3,336	No	ns	0.1911
20 vs. 160	-30.79	-46,98 to -14,60	Yes	****	<0,0001
20 vs. 300	-9.91	-26,10 to 6,276	No	ns	0.4712
20 vs. 1000	-0.39	-16,58 to 15,80	No	ns	>0,9999
40 vs. 80	6.33	-9,856 to 22,52	No	ns	0.8721
40 vs. 160	-11.61	-27,80 to 4,576	No	ns	0.2904
40 vs. 300	9.27	-6,916 to 25,46	No	ns	0.5484
40 vs. 1000	18.79	2,604 to 34,98	Yes	*	0.015
80 vs. 160	-17.94	-34,13 to -1,754	Yes	*	0.0225
80 vs. 300	2.94	-13,25 to 19,13	No	ns	0.997
80 vs. 1000	12.46	-3,726 to 28,65	No	ns	0.2192
160 vs. 300	20.88	4,694 to 37,07	Yes	**	0.0054
160 vs. 1000	30.4	14,21 to 46,59	Yes	****	<0,0001
300 vs. 1000	9.52	-6,666 to 25,71	No	ns	0.5179
- Cis
0 vs. 20	0.01	-16,18 to 16,20	No	ns	>0,9999
0 vs. 40	-6.09	-22,28 to 10,10	No	ns	0.8907
0 vs. 80	-3.03	-19,22 to 13,16	No	ns	0.9965
0 vs. 160	-6.64	-22,83 to 9,546	No	ns	0.8456
0 vs. 300	-2.23	-18,42 to 13,96	No	ns	0.9994
0 vs. 1000	-7.62	-23,81 to 8,566	No	ns	0.7462
20 vs. 40	-6.1	-22,29 to 10,09	No	ns	0.89
20 vs. 80	-3.04	-19,23 to 13,15	No	ns	0.9964
20 vs. 160	-6.65	-22,84 to 9,536	No	ns	0.8447
20 vs. 300	-2.24	-18,43 to 13,95	No	ns	0.9994
20 vs. 1000	-7.63	-23,82 to 8,556	No	ns	0.7451
40 vs. 80	3.06	-13,13 to 19,25	No	ns	0.9963
40 vs. 160	-0.55	-16,74 to 15,64	No	ns	>0,9999
40 vs. 300	3.86	-12,33 to 20,05	No	ns	0.9873
40 vs. 1000	-1.53	-17,72 to 14,66	No	ns	>0,9999
80 vs. 160	-3.61	-19,80 to 12,58	No	ns	0.991
80 vs. 300	0.8	-15,39 to 16,99	No	ns	>0,9999
80 vs. 1000	-4.59	-20,78 to 11,60	No	ns	0.9696
160 vs. 300	4.41	-11,78 to 20,60	No	ns	0.975
160 vs. 1000	-0.98	-17,17 to 15,21	No	ns	>0,9999
300 vs. 1000	-5.39	-21,58 to 10,80	No	ns	0.9355
Test details	Mean 1	Mean 2	Mean Diff,	SE of diff,	N1	N2	q	DF
+ Cis
0 vs. 20	11.4	21.63	-10.23	5.103	1	1	2.835	28
0 vs. 40	11.4	40.81	-29.41	5.103	1	1	8.151	28
0 vs. 80	11.4	34.48	-23.08	5.103	1	1	6.397	28
0 vs. 160	11.4	52.42	-41.02	5.103	1	1	11.37	28
0 vs. 300	11.4	31.54	-20.14	5.103	1	1	5.582	28
0 vs. 1000	11.4	22.02	-10.62	5.103	1	1	2.943	28
20 vs. 40	21.63	40.81	-19.18	5.103	1	1	5.316	28
20 vs. 80	21.63	34.48	-12.85	5.103	1	1	3.561	28
20 vs. 160	21.63	52.42	-30.79	5.103	1	1	8.534	28
20 vs. 300	21.63	31.54	-9.91	5.103	1	1	2.747	28
20 vs. 1000	21.63	22.02	-0.39	5.103	1	1	0.1081	28
40 vs. 80	40.81	34.48	6.33	5.103	1	1	1.754	28
40 vs. 160	40.81	52.42	-11.61	5.103	1	1	3.218	28
40 vs. 300	40.81	31.54	9.27	5.103	1	1	2.569	28
40 vs. 1000	40.81	22.02	18.79	5.103	1	1	5.208	28
80 vs. 160	34.48	52.42	-17.94	5.103	1	1	4.972	28
80 vs. 300	34.48	31.54	2.94	5.103	1	1	0.8148	28
80 vs. 1000	34.48	22.02	12.46	5.103	1	1	3.453	28
160 vs. 300	52.42	31.54	20.88	5.103	1	1	5.787	28
160 vs. 1000	52.42	22.02	30.4	5.103	1	1	8.426	28
300 vs. 1000	31.54	22.02	9.52	5.103	1	1	2.639	28
- Cis
0 vs. 20	3.71	3.7	0.01	5.103	1	1	0.002772	28
0 vs. 40	3.71	9.8	-6.09	5.103	1	1	1.688	28
0 vs. 80	3.71	6.74	-3.03	5.103	1	1	0.8398	28
0 vs. 160	3.71	10.35	-6.64	5.103	1	1	1.84	28
0 vs. 300	3.71	5.94	-2.23	5.103	1	1	0.6181	28
0 vs. 1000	3.71	11.33	-7.62	5.103	1	1	2.112	28
20 vs. 40	3.7	9.8	-6.1	5.103	1	1	1.691	28
20 vs. 80	3.7	6.74	-3.04	5.103	1	1	0.8426	28
20 vs. 160	3.7	10.35	-6.65	5.103	1	1	1.843	28
20 vs. 300	3.7	5.94	-2.24	5.103	1	1	0.6208	28
20 vs. 1000	3.7	11.33	-7.63	5.103	1	1	2.115	28
40 vs. 80	9.8	6.74	3.06	5.103	1	1	0.8481	28
40 vs. 160	9.8	10.35	-0.55	5.103	1	1	0.1524	28
40 vs. 300	9.8	5.94	3.86	5.103	1	1	1.07	28
40 vs. 1000	9.8	11.33	-1.53	5.103	1	1	0.4241	28
80 vs. 160	6.74	10.35	-3.61	5.103	1	1	1.001	28
80 vs. 300	6.74	5.94	0.8	5.103	1	1	0.2217	28
80 vs. 1000	6.74	11.33	-4.59	5.103	1	1	1.272	28
160 vs. 300	10.35	5.94	4.41	5.103	1	1	1.222	28
160 vs. 1000	10.35	11.33	-0.98	5.103	1	1	0.2716	28
300 vs. 1000	5.94	11.33	-5.39	5.103	1	1	1.494	28

## Sheet: Figure 6E
Two-way ANOVA
Within each column, compare rows (simple effects within columns)
Number of families	2
Number of comparisons per family	55
Alpha	0.05
Tukey's multiple comparisons test	Mean Diff,	95,00% CI of diff,	Significant?	Summary	Adjusted P Value
+ Cis
10 poly-dC vs. 20 poly-dC	-33.79	-72,78 to 5,203	No	ns	0.1296
10 poly-dC vs. 30 poly-dC	-55.41	-94,40 to -16,42	Yes	**	0.0017
10 poly-dC vs. 40 poly-dC	-50.13	-89,12 to -11,14	Yes	**	0.0052
10 poly-dC vs. 80 poly-dC	-101.9	-140,9 to -62,89	Yes	****	<0,0001
10 poly-dC vs. 10 poly-dA	2.474	-36,52 to 41,47	No	ns	>0,9999
10 poly-dC vs. 20 poly-dA	-4.261	-43,25 to 34,73	No	ns	>0,9999
10 poly-dC vs. 30 poly-dA	-12.43	-51,43 to 26,56	No	ns	0.983
10 poly-dC vs. 40 poly-dA	-11.77	-50,76 to 27,22	No	ns	0.9885
10 poly-dC vs. 80 poly-dA	-12.41	-51,40 to 26,58	No	ns	0.9833
10 poly-dC vs. 145 poly-dT	-65.3	-104,3 to -26,31	Yes	***	0.0002
20 poly-dC vs. 30 poly-dC	-21.62	-60,62 to 17,37	No	ns	0.6615
20 poly-dC vs. 40 poly-dC	-16.34	-55,33 to 22,65	No	ns	0.9054
20 poly-dC vs. 80 poly-dC	-68.09	-107,1 to -29,10	Yes	***	0.0001
20 poly-dC vs. 10 poly-dA	36.26	-2,729 to 75,25	No	ns	0.0834
20 poly-dC vs. 20 poly-dA	29.53	-9,464 to 68,52	No	ns	0.258
20 poly-dC vs. 30 poly-dA	21.35	-17,64 to 60,34	No	ns	0.6767
20 poly-dC vs. 40 poly-dA	22.02	-16,97 to 61,01	No	ns	0.6395
20 poly-dC vs. 80 poly-dA	21.38	-17,61 to 60,37	No	ns	0.6751
20 poly-dC vs. 145 poly-dT	-31.51	-70,50 to 7,479	No	ns	0.1895
30 poly-dC vs. 40 poly-dC	5.283	-33,71 to 44,27	No	ns	>0,9999
30 poly-dC vs. 80 poly-dC	-46.46	-85,46 to -7,473	Yes	*	0.0112
30 poly-dC vs. 10 poly-dA	57.89	18,90 to 96,88	Yes	**	0.001
30 poly-dC vs. 20 poly-dA	51.15	12,16 to 90,14	Yes	**	0.0042
30 poly-dC vs. 30 poly-dA	42.98	3,987 to 81,97	Yes	*	0.0228
30 poly-dC vs. 40 poly-dA	43.64	4,650 to 82,63	Yes	*	0.0199
30 poly-dC vs. 80 poly-dA	43.01	4,015 to 82,00	Yes	*	0.0227
30 poly-dC vs. 145 poly-dT	-9.888	-48,88 to 29,10	No	ns	0.997
40 poly-dC vs. 80 poly-dC	-51.75	-90,74 to -12,76	Yes	**	0.0037
40 poly-dC vs. 10 poly-dA	52.6	13,61 to 91,59	Yes	**	0.0031
40 poly-dC vs. 20 poly-dA	45.87	6,877 to 84,86	Yes	*	0.0127
40 poly-dC vs. 30 poly-dA	37.69	-1,296 to 76,69	No	ns	0.064
40 poly-dC vs. 40 poly-dA	38.36	-0,6336 to 77,35	No	ns	0.0564
40 poly-dC vs. 80 poly-dA	37.72	-1,269 to 76,71	No	ns	0.0636
40 poly-dC vs. 145 poly-dT	-15.17	-54,16 to 23,82	No	ns	0.9381
80 poly-dC vs. 10 poly-dA	104.4	65,36 to 143,3	Yes	****	<0,0001
80 poly-dC vs. 20 poly-dA	97.62	58,62 to 136,6	Yes	****	<0,0001
80 poly-dC vs. 30 poly-dA	89.44	50,45 to 128,4	Yes	****	<0,0001
80 poly-dC vs. 40 poly-dA	90.1	51,11 to 129,1	Yes	****	<0,0001
80 poly-dC vs. 80 poly-dA	89.47	50,48 to 128,5	Yes	****	<0,0001
80 poly-dC vs. 145 poly-dT	36.58	-2,415 to 75,57	No	ns	0.0788
10 poly-dA vs. 20 poly-dA	-6.735	-45,73 to 32,26	No	ns	0.9999
10 poly-dA vs. 30 poly-dA	-14.91	-53,90 to 24,08	No	ns	0.9443
10 poly-dA vs. 40 poly-dA	-14.25	-53,24 to 24,75	No	ns	0.9579
10 poly-dA vs. 80 poly-dA	-14.88	-53,87 to 24,11	No	ns	0.9449
10 poly-dA vs. 145 poly-dT	-67.77	-106,8 to -28,78	Yes	***	0.0001
20 poly-dA vs. 30 poly-dA	-8.173	-47,16 to 30,82	No	ns	0.9994
20 poly-dA vs. 40 poly-dA	-7.51	-46,50 to 31,48	No	ns	0.9997
20 poly-dA vs. 80 poly-dA	-8.145	-47,14 to 30,85	No	ns	0.9994
20 poly-dA vs. 145 poly-dT	-61.04	-100,0 to -22,05	Yes	***	0.0005
30 poly-dA vs. 40 poly-dA	0.6628	-38,33 to 39,65	No	ns	>0,9999
30 poly-dA vs. 80 poly-dA	0.02788	-38,96 to 39,02	No	ns	>0,9999
30 poly-dA vs. 145 poly-dT	-52.87	-91,86 to -13,87	Yes	**	0.0029
40 poly-dA vs. 80 poly-dA	-0.6349	-39,63 to 38,36	No	ns	>0,9999
40 poly-dA vs. 145 poly-dT	-53.53	-92,52 to -14,54	Yes	**	0.0025
80 poly-dA vs. 145 poly-dT	-52.89	-91,88 to -13,90	Yes	**	0.0029
- Cis
10 poly-dC vs. 20 poly-dC	-2.383	-41,37 to 36,61	No	ns	>0,9999
10 poly-dC vs. 30 poly-dC	-8.144	-47,14 to 30,85	No	ns	0.9994
10 poly-dC vs. 40 poly-dC	-8.077	-47,07 to 30,91	No	ns	0.9994
10 poly-dC vs. 80 poly-dC	-45.2	-84,20 to -6,213	Yes	*	0.0145
10 poly-dC vs. 10 poly-dA	0.2856	-38,71 to 39,28	No	ns	>0,9999
10 poly-dC vs. 20 poly-dA	-0.03446	-39,03 to 38,96	No	ns	>0,9999
10 poly-dC vs. 30 poly-dA	0.2241	-38,77 to 39,22	No	ns	>0,9999
10 poly-dC vs. 40 poly-dA	0.04645	-38,94 to 39,04	No	ns	>0,9999
10 poly-dC vs. 80 poly-dA	-11	-50,00 to 27,99	No	ns	0.993
10 poly-dC vs. 145 poly-dT	-18.82	-57,81 to 20,17	No	ns	0.8077
20 poly-dC vs. 30 poly-dC	-5.761	-44,75 to 33,23	No	ns	>0,9999
20 poly-dC vs. 40 poly-dC	-5.694	-44,68 to 33,30	No	ns	>0,9999
20 poly-dC vs. 80 poly-dC	-42.82	-81,81 to -3,830	Yes	*	0.0235
20 poly-dC vs. 10 poly-dA	2.669	-36,32 to 41,66	No	ns	>0,9999
20 poly-dC vs. 20 poly-dA	2.348	-36,64 to 41,34	No	ns	>0,9999
20 poly-dC vs. 30 poly-dA	2.607	-36,38 to 41,60	No	ns	>0,9999
20 poly-dC vs. 40 poly-dA	2.429	-36,56 to 41,42	No	ns	>0,9999
20 poly-dC vs. 80 poly-dA	-8.621	-47,61 to 30,37	No	ns	0.999
20 poly-dC vs. 145 poly-dT	-16.44	-55,43 to 22,55	No	ns	0.9023
30 poly-dC vs. 40 poly-dC	0.06775	-38,92 to 39,06	No	ns	>0,9999
30 poly-dC vs. 80 poly-dC	-37.06	-76,05 to 1,931	No	ns	0.072
30 poly-dC vs. 10 poly-dA	8.43	-30,56 to 47,42	No	ns	0.9992
30 poly-dC vs. 20 poly-dA	8.11	-30,88 to 47,10	No	ns	0.9994
30 poly-dC vs. 30 poly-dA	8.368	-30,62 to 47,36	No	ns	0.9992
30 poly-dC vs. 40 poly-dA	8.191	-30,80 to 47,18	No	ns	0.9994
30 poly-dC vs. 80 poly-dA	-2.86	-41,85 to 36,13	No	ns	>0,9999
30 poly-dC vs. 145 poly-dT	-10.68	-49,67 to 28,31	No	ns	0.9945
40 poly-dC vs. 80 poly-dC	-37.13	-76,12 to 1,864	No	ns	0.0711
40 poly-dC vs. 10 poly-dA	8.362	-30,63 to 47,35	No	ns	0.9992
40 poly-dC vs. 20 poly-dA	8.042	-30,95 to 47,03	No	ns	0.9995
40 poly-dC vs. 30 poly-dA	8.301	-30,69 to 47,29	No	ns	0.9993
40 poly-dC vs. 40 poly-dA	8.123	-30,87 to 47,11	No	ns	0.9994
40 poly-dC vs. 80 poly-dA	-2.928	-41,92 to 36,06	No	ns	>0,9999
40 poly-dC vs. 145 poly-dT	-10.74	-49,74 to 28,25	No	ns	0.9942
80 poly-dC vs. 10 poly-dA	45.49	6,499 to 84,48	Yes	*	0.0137
80 poly-dC vs. 20 poly-dA	45.17	6,179 to 84,16	Yes	*	0.0146
80 poly-dC vs. 30 poly-dA	45.43	6,437 to 84,42	Yes	*	0.0139
80 poly-dC vs. 40 poly-dA	45.25	6,259 to 84,24	Yes	*	0.0144
80 poly-dC vs. 80 poly-dA	34.2	-4,791 to 73,19	No	ns	0.1207
80 poly-dC vs. 145 poly-dT	26.38	-12,61 to 65,37	No	ns	0.3986
10 poly-dA vs. 20 poly-dA	-0.3201	-39,31 to 38,67	No	ns	>0,9999
10 poly-dA vs. 30 poly-dA	-0.0615	-39,05 to 38,93	No	ns	>0,9999
10 poly-dA vs. 40 poly-dA	-0.2392	-39,23 to 38,75	No	ns	>0,9999
10 poly-dA vs. 80 poly-dA	-11.29	-50,28 to 27,70	No	ns	0.9915
10 poly-dA vs. 145 poly-dT	-19.11	-58,10 to 19,88	No	ns	0.7942
20 poly-dA vs. 30 poly-dA	0.2586	-38,73 to 39,25	No	ns	>0,9999
20 poly-dA vs. 40 poly-dA	0.08091	-38,91 to 39,07	No	ns	>0,9999
20 poly-dA vs. 80 poly-dA	-10.97	-49,96 to 28,02	No	ns	0.9932
20 poly-dA vs. 145 poly-dT	-18.79	-57,78 to 20,20	No	ns	0.8093
30 poly-dA vs. 40 poly-dA	-0.1777	-39,17 to 38,81	No	ns	>0,9999
30 poly-dA vs. 80 poly-dA	-11.23	-50,22 to 27,76	No	ns	0.9919
30 poly-dA vs. 145 poly-dT	-19.05	-58,04 to 19,95	No	ns	0.7971
40 poly-dA vs. 80 poly-dA	-11.05	-50,04 to 27,94	No	ns	0.9928
40 poly-dA vs. 145 poly-dT	-18.87	-57,86 to 20,12	No	ns	0.8055
80 poly-dA vs. 145 poly-dT	-7.817	-46,81 to 31,17	No	ns	0.9996
Test details	Mean 1	Mean 2	Mean Diff,	SE of diff,	N1	N2	q	DF
+ Cis
10 poly-dC vs. 20 poly-dC	6.234	40.02	-33.79	10.91	1	1	4.381	22
10 poly-dC vs. 30 poly-dC	6.234	61.65	-55.41	10.91	1	1	7.185	22
10 poly-dC vs. 40 poly-dC	6.234	56.36	-50.13	10.91	1	1	6.5	22
10 poly-dC vs. 80 poly-dC	6.234	108.1	-101.9	10.91	1	1	13.21	22
10 poly-dC vs. 10 poly-dA	6.234	3.759	2.474	10.91	1	1	0.3208	22
10 poly-dC vs. 20 poly-dA	6.234	10.49	-4.261	10.91	1	1	0.5525	22
10 poly-dC vs. 30 poly-dA	6.234	18.67	-12.43	10.91	1	1	1.612	22
10 poly-dC vs. 40 poly-dA	6.234	18.01	-11.77	10.91	1	1	1.526	22
10 poly-dC vs. 80 poly-dA	6.234	18.64	-12.41	10.91	1	1	1.609	22
10 poly-dC vs. 145 poly-dT	6.234	71.53	-65.3	10.91	1	1	8.467	22
20 poly-dC vs. 30 poly-dC	40.02	61.65	-21.62	10.91	1	1	2.804	22
20 poly-dC vs. 40 poly-dC	40.02	56.36	-16.34	10.91	1	1	2.119	22
20 poly-dC vs. 80 poly-dC	40.02	108.1	-68.09	10.91	1	1	8.828	22
20 poly-dC vs. 10 poly-dA	40.02	3.759	36.26	10.91	1	1	4.702	22
20 poly-dC vs. 20 poly-dA	40.02	10.49	29.53	10.91	1	1	3.828	22
20 poly-dC vs. 30 poly-dA	40.02	18.67	21.35	10.91	1	1	2.769	22
20 poly-dC vs. 40 poly-dA	40.02	18.01	22.02	10.91	1	1	2.855	22
20 poly-dC vs. 80 poly-dA	40.02	18.64	21.38	10.91	1	1	2.772	22
20 poly-dC vs. 145 poly-dT	40.02	71.53	-31.51	10.91	1	1	4.086	22
30 poly-dC vs. 40 poly-dC	61.65	56.36	5.283	10.91	1	1	0.685	22
30 poly-dC vs. 80 poly-dC	61.65	108.1	-46.46	10.91	1	1	6.024	22
30 poly-dC vs. 10 poly-dA	61.65	3.759	57.89	10.91	1	1	7.506	22
30 poly-dC vs. 20 poly-dA	61.65	10.49	51.15	10.91	1	1	6.632	22
30 poly-dC vs. 30 poly-dA	61.65	18.67	42.98	10.91	1	1	5.572	22
30 poly-dC vs. 40 poly-dA	61.65	18.01	43.64	10.91	1	1	5.658	22
30 poly-dC vs. 80 poly-dA	61.65	18.64	43.01	10.91	1	1	5.576	22
30 poly-dC vs. 145 poly-dT	61.65	71.53	-9.888	10.91	1	1	1.282	22
40 poly-dC vs. 80 poly-dC	56.36	108.1	-51.75	10.91	1	1	6.71	22
40 poly-dC vs. 10 poly-dA	56.36	3.759	52.6	10.91	1	1	6.82	22
40 poly-dC vs. 20 poly-dA	56.36	10.49	45.87	10.91	1	1	5.947	22
40 poly-dC vs. 30 poly-dA	56.36	18.67	37.69	10.91	1	1	4.887	22
40 poly-dC vs. 40 poly-dA	56.36	18.01	38.36	10.91	1	1	4.973	22
40 poly-dC vs. 80 poly-dA	56.36	18.64	37.72	10.91	1	1	4.891	22
40 poly-dC vs. 145 poly-dT	56.36	71.53	-15.17	10.91	1	1	1.967	22
80 poly-dC vs. 10 poly-dA	108.1	3.759	104.4	10.91	1	1	13.53	22
80 poly-dC vs. 20 poly-dA	108.1	10.49	97.62	10.91	1	1	12.66	22
80 poly-dC vs. 30 poly-dA	108.1	18.67	89.44	10.91	1	1	11.6	22
80 poly-dC vs. 40 poly-dA	108.1	18.01	90.1	10.91	1	1	11.68	22
80 poly-dC vs. 80 poly-dA	108.1	18.64	89.47	10.91	1	1	11.6	22
80 poly-dC vs. 145 poly-dT	108.1	71.53	36.58	10.91	1	1	4.742	22
10 poly-dA vs. 20 poly-dA	3.759	10.49	-6.735	10.91	1	1	0.8733	22
10 poly-dA vs. 30 poly-dA	3.759	18.67	-14.91	10.91	1	1	1.933	22
10 poly-dA vs. 40 poly-dA	3.759	18.01	-14.25	10.91	1	1	1.847	22
10 poly-dA vs. 80 poly-dA	3.759	18.64	-14.88	10.91	1	1	1.929	22
10 poly-dA vs. 145 poly-dT	3.759	71.53	-67.77	10.91	1	1	8.788	22
20 poly-dA vs. 30 poly-dA	10.49	18.67	-8.173	10.91	1	1	1.06	22
20 poly-dA vs. 40 poly-dA	10.49	18.01	-7.51	10.91	1	1	0.9738	22
20 poly-dA vs. 80 poly-dA	10.49	18.64	-8.145	10.91	1	1	1.056	22
20 poly-dA vs. 145 poly-dT	10.49	71.53	-61.04	10.91	1	1	7.914	22
30 poly-dA vs. 40 poly-dA	18.67	18.01	0.6628	10.91	1	1	0.08594	22
30 poly-dA vs. 80 poly-dA	18.67	18.64	0.02788	10.91	1	1	0.003615	22
30 poly-dA vs. 145 poly-dT	18.67	71.53	-52.87	10.91	1	1	6.855	22
40 poly-dA vs. 80 poly-dA	18.01	18.64	-0.6349	10.91	1	1	0.08233	22
40 poly-dA vs. 145 poly-dT	18.01	71.53	-53.53	10.91	1	1	6.94	22
80 poly-dA vs. 145 poly-dT	18.64	71.53	-52.89	10.91	1	1	6.858	22
- Cis
10 poly-dC vs. 20 poly-dC	4.556	6.939	-2.383	10.91	1	1	0.309	22
10 poly-dC vs. 30 poly-dC	4.556	12.7	-8.144	10.91	1	1	1.056	22
10 poly-dC vs. 40 poly-dC	4.556	12.63	-8.077	10.91	1	1	1.047	22
10 poly-dC vs. 80 poly-dC	4.556	49.76	-45.2	10.91	1	1	5.861	22
10 poly-dC vs. 10 poly-dA	4.556	4.27	0.2856	10.91	1	1	0.03704	22
10 poly-dC vs. 20 poly-dA	4.556	4.59	-0.03446	10.91	1	1	0.004468	22
10 poly-dC vs. 30 poly-dA	4.556	4.332	0.2241	10.91	1	1	0.02906	22
10 poly-dC vs. 40 poly-dA	4.556	4.509	0.04645	10.91	1	1	0.006023	22
10 poly-dC vs. 80 poly-dA	4.556	15.56	-11	10.91	1	1	1.427	22
10 poly-dC vs. 145 poly-dT	4.556	23.38	-18.82	10.91	1	1	2.44	22
20 poly-dC vs. 30 poly-dC	6.939	12.7	-5.761	10.91	1	1	0.747	22
20 poly-dC vs. 40 poly-dC	6.939	12.63	-5.694	10.91	1	1	0.7382	22
20 poly-dC vs. 80 poly-dC	6.939	49.76	-42.82	10.91	1	1	5.552	22
20 poly-dC vs. 10 poly-dA	6.939	4.27	2.669	10.91	1	1	0.346	22
20 poly-dC vs. 20 poly-dA	6.939	4.59	2.348	10.91	1	1	0.3045	22
20 poly-dC vs. 30 poly-dA	6.939	4.332	2.607	10.91	1	1	0.338	22
20 poly-dC vs. 40 poly-dA	6.939	4.509	2.429	10.91	1	1	0.315	22
20 poly-dC vs. 80 poly-dA	6.939	15.56	-8.621	10.91	1	1	1.118	22
20 poly-dC vs. 145 poly-dT	6.939	23.38	-16.44	10.91	1	1	2.131	22
30 poly-dC vs. 40 poly-dC	12.7	12.63	0.06775	10.91	1	1	0.008785	22
30 poly-dC vs. 80 poly-dC	12.7	49.76	-37.06	10.91	1	1	4.805	22
30 poly-dC vs. 10 poly-dA	12.7	4.27	8.43	10.91	1	1	1.093	22
30 poly-dC vs. 20 poly-dA	12.7	4.59	8.11	10.91	1	1	1.052	22
30 poly-dC vs. 30 poly-dA	12.7	4.332	8.368	10.91	1	1	1.085	22
30 poly-dC vs. 40 poly-dA	12.7	4.509	8.191	10.91	1	1	1.062	22
30 poly-dC vs. 80 poly-dA	12.7	15.56	-2.86	10.91	1	1	0.3708	22
30 poly-dC vs. 145 poly-dT	12.7	23.38	-10.68	10.91	1	1	1.384	22
40 poly-dC vs. 80 poly-dC	12.63	49.76	-37.13	10.91	1	1	4.814	22
40 poly-dC vs. 10 poly-dA	12.63	4.27	8.362	10.91	1	1	1.084	22
40 poly-dC vs. 20 poly-dA	12.63	4.59	8.042	10.91	1	1	1.043	22
40 poly-dC vs. 30 poly-dA	12.63	4.332	8.301	10.91	1	1	1.076	22
40 poly-dC vs. 40 poly-dA	12.63	4.509	8.123	10.91	1	1	1.053	22
40 poly-dC vs. 80 poly-dA	12.63	15.56	-2.928	10.91	1	1	0.3796	22
40 poly-dC vs. 145 poly-dT	12.63	23.38	-10.74	10.91	1	1	1.393	22
80 poly-dC vs. 10 poly-dA	49.76	4.27	45.49	10.91	1	1	5.898	22
80 poly-dC vs. 20 poly-dA	49.76	4.59	45.17	10.91	1	1	5.857	22
80 poly-dC vs. 30 poly-dA	49.76	4.332	45.43	10.91	1	1	5.89	22
80 poly-dC vs. 40 poly-dA	49.76	4.509	45.25	10.91	1	1	5.867	22
80 poly-dC vs. 80 poly-dA	49.76	15.56	34.2	10.91	1	1	4.434	22
80 poly-dC vs. 145 poly-dT	49.76	23.38	26.38	10.91	1	1	3.421	22
10 poly-dA vs. 20 poly-dA	4.27	4.59	-0.3201	10.91	1	1	0.0415	22
10 poly-dA vs. 30 poly-dA	4.27	4.332	-0.0615	10.91	1	1	0.007974	22
10 poly-dA vs. 40 poly-dA	4.27	4.509	-0.2392	10.91	1	1	0.03101	22
10 poly-dA vs. 80 poly-dA	4.27	15.56	-11.29	10.91	1	1	1.464	22
10 poly-dA vs. 145 poly-dT	4.27	23.38	-19.11	10.91	1	1	2.477	22
20 poly-dA vs. 30 poly-dA	4.59	4.332	0.2586	10.91	1	1	0.03353	22
20 poly-dA vs. 40 poly-dA	4.59	4.509	0.08091	10.91	1	1	0.01049	22
20 poly-dA vs. 80 poly-dA	4.59	15.56	-10.97	10.91	1	1	1.422	22
20 poly-dA vs. 145 poly-dT	4.59	23.38	-18.79	10.91	1	1	2.436	22
30 poly-dA vs. 40 poly-dA	4.332	4.509	-0.1777	10.91	1	1	0.02304	22
30 poly-dA vs. 80 poly-dA	4.332	15.56	-11.23	10.91	1	1	1.456	22
30 poly-dA vs. 145 poly-dT	4.332	23.38	-19.05	10.91	1	1	2.469	22
40 poly-dA vs. 80 poly-dA	4.509	15.56	-11.05	10.91	1	1	1.433	22
40 poly-dA vs. 145 poly-dT	4.509	23.38	-18.87	10.91	1	1	2.446	22
80 poly-dA vs. 145 poly-dT	15.56	23.38	-7.817	10.91	1	1	1.014	22

## Sheet: Figure 7B
Two-way ANOVA
Within each column, compare rows (simple effects within columns)
Number of families	2
Number of comparisons per family	28
Alpha	0.05
Tukey's multiple comparisons test	Mean Diff,	95,00% CI of diff,	Significant?	Summary	Adjusted P Value
+ Cis
PBST vs. 10	89	-219,9 to 397,9	No	ns	0.9802
PBST vs. 20	130	-178,9 to 438,9	No	ns	0.8667
PBST vs. 30	126.7	-182,2 to 435,5	No	ns	0.8811
PBST vs. 50	-76.67	-385,5 to 232,2	No	ns	0.9917
PBST vs. 82	-404.7	-713,5 to -95,80	Yes	**	0.0039
PBST vs. 120	-1161	-1470 to -852,1	Yes	****	<0,0001
PBST vs. 145	-1261	-1570 to -951,8	Yes	****	<0,0001
10 vs. 20	41	-267,9 to 349,9	No	ns	0.9998
10 vs. 30	37.67	-271,2 to 346,5	No	ns	>0,9999
10 vs. 50	-165.7	-474,5 to 143,2	No	ns	0.664
10 vs. 82	-493.7	-802,5 to -184,8	Yes	***	0.0003
10 vs. 120	-1250	-1559 to -941,1	Yes	****	<0,0001
10 vs. 145	-1350	-1659 to -1041	Yes	****	<0,0001
20 vs. 30	-3.333	-312,2 to 305,5	No	ns	>0,9999
20 vs. 50	-206.7	-515,5 to 102,2	No	ns	0.3967
20 vs. 82	-534.7	-843,5 to -225,8	Yes	****	<0,0001
20 vs. 120	-1291	-1600 to -982,1	Yes	****	<0,0001
20 vs. 145	-1391	-1700 to -1082	Yes	****	<0,0001
30 vs. 50	-203.3	-512,2 to 105,5	No	ns	0.417
30 vs. 82	-531.3	-840,2 to -222,5	Yes	****	<0,0001
30 vs. 120	-1288	-1597 to -978,8	Yes	****	<0,0001
30 vs. 145	-1387	-1696 to -1078	Yes	****	<0,0001
50 vs. 82	-328	-636,9 to -19,13	Yes	*	0.031
50 vs. 120	-1084	-1393 to -775,5	Yes	****	<0,0001
50 vs. 145	-1184	-1493 to -875,1	Yes	****	<0,0001
82 vs. 120	-756.3	-1065 to -447,5	Yes	****	<0,0001
82 vs. 145	-856	-1165 to -547,1	Yes	****	<0,0001
120 vs. 145	-99.67	-408,5 to 209,2	No	ns	0.9633
- Cis
PBST vs. 10	33.33	-275,5 to 342,2	No	ns	>0,9999
PBST vs. 20	84	-224,9 to 392,9	No	ns	0.9858
PBST vs. 30	94	-214,9 to 402,9	No	ns	0.9733
PBST vs. 50	59.67	-249,2 to 368,5	No	ns	0.9982
PBST vs. 82	20.67	-288,2 to 329,5	No	ns	>0,9999
PBST vs. 120	23	-285,9 to 331,9	No	ns	>0,9999
PBST vs. 145	37	-271,9 to 345,9	No	ns	>0,9999
10 vs. 20	50.67	-258,2 to 359,5	No	ns	0.9994
10 vs. 30	60.67	-248,2 to 369,5	No	ns	0.998
10 vs. 50	26.33	-282,5 to 335,2	No	ns	>0,9999
10 vs. 82	-12.67	-321,5 to 296,2	No	ns	>0,9999
10 vs. 120	-10.33	-319,2 to 298,5	No	ns	>0,9999
10 vs. 145	3.667	-305,2 to 312,5	No	ns	>0,9999
20 vs. 30	10	-298,9 to 318,9	No	ns	>0,9999
20 vs. 50	-24.33	-333,2 to 284,5	No	ns	>0,9999
20 vs. 82	-63.33	-372,2 to 245,5	No	ns	0.9974
20 vs. 120	-61	-369,9 to 247,9	No	ns	0.998
20 vs. 145	-47	-355,9 to 261,9	No	ns	0.9996
30 vs. 50	-34.33	-343,2 to 274,5	No	ns	>0,9999
30 vs. 82	-73.33	-382,2 to 235,5	No	ns	0.9936
30 vs. 120	-71	-379,9 to 237,9	No	ns	0.9947
30 vs. 145	-57	-365,9 to 251,9	No	ns	0.9987
50 vs. 82	-39	-347,9 to 269,9	No	ns	0.9999
50 vs. 120	-36.67	-345,5 to 272,2	No	ns	>0,9999
50 vs. 145	-22.67	-331,5 to 286,2	No	ns	>0,9999
82 vs. 120	2.333	-306,5 to 311,2	No	ns	>0,9999
82 vs. 145	16.33	-292,5 to 325,2	No	ns	>0,9999
120 vs. 145	14	-294,9 to 322,9	No	ns	>0,9999
Test details	Mean 1	Mean 2	Mean Diff,	SE of diff,	N1	N2	q	DF
+ Cis
PBST vs. 10	380.3	291.3	89	95.35	3	3	1.32	32
PBST vs. 20	380.3	250.3	130	95.35	3	3	1.928	32
PBST vs. 30	380.3	253.7	126.7	95.35	3	3	1.879	32
PBST vs. 50	380.3	457	-76.67	95.35	3	3	1.137	32
PBST vs. 82	380.3	785	-404.7	95.35	3	3	6.002	32
PBST vs. 120	380.3	1541	-1161	95.35	3	3	17.22	32
PBST vs. 145	380.3	1641	-1261	95.35	3	3	18.7	32
10 vs. 20	291.3	250.3	41	95.35	3	3	0.6081	32
10 vs. 30	291.3	253.7	37.67	95.35	3	3	0.5587	32
10 vs. 50	291.3	457	-165.7	95.35	3	3	2.457	32
10 vs. 82	291.3	785	-493.7	95.35	3	3	7.322	32
10 vs. 120	291.3	1541	-1250	95.35	3	3	18.54	32
10 vs. 145	291.3	1641	-1350	95.35	3	3	20.02	32
20 vs. 30	250.3	253.7	-3.333	95.35	3	3	0.04944	32
20 vs. 50	250.3	457	-206.7	95.35	3	3	3.065	32
20 vs. 82	250.3	785	-534.7	95.35	3	3	7.93	32
20 vs. 120	250.3	1541	-1291	95.35	3	3	19.15	32
20 vs. 145	250.3	1641	-1391	95.35	3	3	20.63	32
30 vs. 50	253.7	457	-203.3	95.35	3	3	3.016	32
30 vs. 82	253.7	785	-531.3	95.35	3	3	7.881	32
30 vs. 120	253.7	1541	-1288	95.35	3	3	19.1	32
30 vs. 145	253.7	1641	-1387	95.35	3	3	20.58	32
50 vs. 82	457	785	-328	95.35	3	3	4.865	32
50 vs. 120	457	1541	-1084	95.35	3	3	16.08	32
50 vs. 145	457	1641	-1184	95.35	3	3	17.56	32
82 vs. 120	785	1541	-756.3	95.35	3	3	11.22	32
82 vs. 145	785	1641	-856	95.35	3	3	12.7	32
120 vs. 145	1541	1641	-99.67	95.35	3	3	1.478	32
- Cis
PBST vs. 10	342	308.7	33.33	95.35	3	3	0.4944	32
PBST vs. 20	342	258	84	95.35	3	3	1.246	32
PBST vs. 30	342	248	94	95.35	3	3	1.394	32
PBST vs. 50	342	282.3	59.67	95.35	3	3	0.885	32
PBST vs. 82	342	321.3	20.67	95.35	3	3	0.3065	32
PBST vs. 120	342	319	23	95.35	3	3	0.3411	32
PBST vs. 145	342	305	37	95.35	3	3	0.5488	32
10 vs. 20	308.7	258	50.67	95.35	3	3	0.7515	32
10 vs. 30	308.7	248	60.67	95.35	3	3	0.8998	32
10 vs. 50	308.7	282.3	26.33	95.35	3	3	0.3906	32
10 vs. 82	308.7	321.3	-12.67	95.35	3	3	0.1879	32
10 vs. 120	308.7	319	-10.33	95.35	3	3	0.1533	32
10 vs. 145	308.7	305	3.667	95.35	3	3	0.05438	32
20 vs. 30	258	248	10	95.35	3	3	0.1483	32
20 vs. 50	258	282.3	-24.33	95.35	3	3	0.3609	32
20 vs. 82	258	321.3	-63.33	95.35	3	3	0.9394	32
20 vs. 120	258	319	-61	95.35	3	3	0.9047	32
20 vs. 145	258	305	-47	95.35	3	3	0.6971	32
30 vs. 50	248	282.3	-34.33	95.35	3	3	0.5092	32
30 vs. 82	248	321.3	-73.33	95.35	3	3	1.088	32
30 vs. 120	248	319	-71	95.35	3	3	1.053	32
30 vs. 145	248	305	-57	95.35	3	3	0.8454	32
50 vs. 82	282.3	321.3	-39	95.35	3	3	0.5784	32
50 vs. 120	282.3	319	-36.67	95.35	3	3	0.5438	32
50 vs. 145	282.3	305	-22.67	95.35	3	3	0.3362	32
82 vs. 120	321.3	319	2.333	95.35	3	3	0.03461	32
82 vs. 145	321.3	305	16.33	95.35	3	3	0.2423	32
120 vs. 145	319	305	14	95.35	3	3	0.2076	32

## Sheet: Figure 7D
Two-way ANOVA
Within each column, compare rows (simple effects within columns)
Number of families	2
Number of comparisons per family	28
Alpha	0.05
Tukey's multiple comparisons test	Mean Diff,	95,00% CI of diff,	Significant?	Summary	Adjusted P Value
+ Cis
PBST vs. 10	-210930	-247102 to -174757	Yes	****	<0,0001
PBST vs. 20	-202028	-238200 to -165856	Yes	****	<0,0001
PBST vs. 30	-198189	-234361 to -162017	Yes	****	<0,0001
PBST vs. 50	-197628	-233800 to -161456	Yes	****	<0,0001
PBST vs. 82	-234605	-270777 to -198432	Yes	****	<0,0001
PBST vs. 120	-272727	-308899 to -236554	Yes	****	<0,0001
PBST vs. 145	-280457	-316629 to -244285	Yes	****	<0,0001
10 vs. 20	8902	-27271 to 45074	No	ns	0.9866
10 vs. 30	12741	-23432 to 48913	No	ns	0.9144
10 vs. 50	13302	-22871 to 49474	No	ns	0.8961
10 vs. 82	-23675	-59847 to 12497	No	ns	0.3667
10 vs. 120	-61797	-97969 to -25625	Yes	***	0.0005
10 vs. 145	-69528	-105700 to -33355	Yes	***	0.0001
20 vs. 30	3839	-32333 to 40011	No	ns	>0,9999
20 vs. 50	4400	-31772 to 40572	No	ns	0.9998
20 vs. 82	-32577	-68749 to 3596	No	ns	0.0939
20 vs. 120	-70699	-106871 to -34526	Yes	****	<0,0001
20 vs. 145	-78429	-114601 to -42257	Yes	****	<0,0001
30 vs. 50	561	-35611 to 36733	No	ns	>0,9999
30 vs. 82	-36416	-72588 to -243,2	Yes	*	0.0479
30 vs. 120	-74538	-110710 to -38365	Yes	****	<0,0001
30 vs. 145	-82268	-118440 to -46096	Yes	****	<0,0001
50 vs. 82	-36977	-73149 to -804,2	Yes	*	0.0433
50 vs. 120	-75099	-111271 to -38926	Yes	****	<0,0001
50 vs. 145	-82829	-119001 to -46657	Yes	****	<0,0001
82 vs. 120	-38122	-74294 to -1950	Yes	*	0.0351
82 vs. 145	-45853	-82025 to -9680	Yes	**	0.0084
120 vs. 145	-7731	-43903 to 28442	No	ns	0.9941
- Cis
PBST vs. 10	-248015	-284187 to -211843	Yes	****	<0,0001
PBST vs. 20	-226363	-262535 to -190191	Yes	****	<0,0001
PBST vs. 30	-216982	-253154 to -180809	Yes	****	<0,0001
PBST vs. 50	-196592	-232764 to -160420	Yes	****	<0,0001
PBST vs. 82	-201045	-237217 to -164872	Yes	****	<0,0001
PBST vs. 120	-204243	-240415 to -168071	Yes	****	<0,0001
PBST vs. 145	-204920	-241092 to -168747	Yes	****	<0,0001
10 vs. 20	21652	-14520 to 57824	No	ns	0.4694
10 vs. 30	31034	-5139 to 67206	No	ns	0.1218
10 vs. 50	51423	15251 to 87595	Yes	**	0.003
10 vs. 82	46971	10798 to 83143	Yes	**	0.0068
10 vs. 120	43772	7600 to 79944	Yes	*	0.0124
10 vs. 145	43096	6923 to 79268	Yes	*	0.014
20 vs. 30	9382	-26791 to 45554	No	ns	0.982
20 vs. 50	29771	-6401 to 65943	No	ns	0.1498
20 vs. 82	25319	-10854 to 61491	No	ns	0.294
20 vs. 120	22120	-14052 to 58292	No	ns	0.4446
20 vs. 145	21444	-14729 to 57616	No	ns	0.4807
30 vs. 50	20390	-15783 to 56562	No	ns	0.539
30 vs. 82	15937	-20235 to 52109	No	ns	0.784
30 vs. 120	12739	-23434 to 48911	No	ns	0.9145
30 vs. 145	12062	-24110 to 48234	No	ns	0.9338
50 vs. 82	-4453	-40625 to 31720	No	ns	0.9998
50 vs. 120	-7651	-43823 to 28521	No	ns	0.9944
50 vs. 145	-8328	-44500 to 27845	No	ns	0.9908
82 vs. 120	-3199	-39371 to 32974	No	ns	>0,9999
82 vs. 145	-3875	-40047 to 32297	No	ns	>0,9999
120 vs. 145	-676.5	-36849 to 35496	No	ns	>0,9999
Test details	Mean 1	Mean 2	Mean Diff,	SE of diff,	N1	N2	q	DF
+ Cis
PBST vs. 10	727	211657	-210930	10448	2	2	28.55	16
PBST vs. 20	727	202755	-202028	10448	2	2	27.35	16
PBST vs. 30	727	198916	-198189	10448	2	2	26.83	16
PBST vs. 50	727	198355	-197628	10448	2	2	26.75	16
PBST vs. 82	727	235332	-234605	10448	2	2	31.76	16
PBST vs. 120	727	273454	-272727	10448	2	2	36.92	16
PBST vs. 145	727	281184	-280457	10448	2	2	37.96	16
10 vs. 20	211657	202755	8902	10448	2	2	1.205	16
10 vs. 30	211657	198916	12741	10448	2	2	1.725	16
10 vs. 50	211657	198355	13302	10448	2	2	1.8	16
10 vs. 82	211657	235332	-23675	10448	2	2	3.205	16
10 vs. 120	211657	273454	-61797	10448	2	2	8.365	16
10 vs. 145	211657	281184	-69528	10448	2	2	9.411	16
20 vs. 30	202755	198916	3839	10448	2	2	0.5196	16
20 vs. 50	202755	198355	4400	10448	2	2	0.5956	16
20 vs. 82	202755	235332	-32577	10448	2	2	4.409	16
20 vs. 120	202755	273454	-70699	10448	2	2	9.57	16
20 vs. 145	202755	281184	-78429	10448	2	2	10.62	16
30 vs. 50	198916	198355	561	10448	2	2	0.07594	16
30 vs. 82	198916	235332	-36416	10448	2	2	4.929	16
30 vs. 120	198916	273454	-74538	10448	2	2	10.09	16
30 vs. 145	198916	281184	-82268	10448	2	2	11.14	16
50 vs. 82	198355	235332	-36977	10448	2	2	5.005	16
50 vs. 120	198355	273454	-75099	10448	2	2	10.17	16
50 vs. 145	198355	281184	-82829	10448	2	2	11.21	16
82 vs. 120	235332	273454	-38122	10448	2	2	5.16	16
82 vs. 145	235332	281184	-45853	10448	2	2	6.207	16
120 vs. 145	273454	281184	-7731	10448	2	2	1.046	16
- Cis
PBST vs. 10	701.5	248717	-248015	10448	2	2	33.57	16
PBST vs. 20	701.5	227065	-226363	10448	2	2	30.64	16
PBST vs. 30	701.5	217683	-216982	10448	2	2	29.37	16
PBST vs. 50	701.5	197294	-196592	10448	2	2	26.61	16
PBST vs. 82	701.5	201746	-201045	10448	2	2	27.21	16
PBST vs. 120	701.5	204945	-204243	10448	2	2	27.65	16
PBST vs. 145	701.5	205621	-204920	10448	2	2	27.74	16
10 vs. 20	248717	227065	21652	10448	2	2	2.931	16
10 vs. 30	248717	217683	31034	10448	2	2	4.201	16
10 vs. 50	248717	197294	51423	10448	2	2	6.961	16
10 vs. 82	248717	201746	46971	10448	2	2	6.358	16
10 vs. 120	248717	204945	43772	10448	2	2	5.925	16
10 vs. 145	248717	205621	43096	10448	2	2	5.833	16
20 vs. 30	227065	217683	9382	10448	2	2	1.27	16
20 vs. 50	227065	197294	29771	10448	2	2	4.03	16
20 vs. 82	227065	201746	25319	10448	2	2	3.427	16
20 vs. 120	227065	204945	22120	10448	2	2	2.994	16
20 vs. 145	227065	205621	21444	10448	2	2	2.903	16
30 vs. 50	217683	197294	20390	10448	2	2	2.76	16
30 vs. 82	217683	201746	15937	10448	2	2	2.157	16
30 vs. 120	217683	204945	12739	10448	2	2	1.724	16
30 vs. 145	217683	205621	12062	10448	2	2	1.633	16
50 vs. 82	197294	201746	-4453	10448	2	2	0.6027	16
50 vs. 120	197294	204945	-7651	10448	2	2	1.036	16
50 vs. 145	197294	205621	-8328	10448	2	2	1.127	16
82 vs. 120	201746	204945	-3199	10448	2	2	0.4329	16
82 vs. 145	201746	205621	-3875	10448	2	2	0.5245	16
120 vs. 145	204945	205621	-676.5	10448	2	2	0.09157	16

## Sheet: Figure 7F
Two-way ANOVA
Within each column, compare rows (simple effects within columns)
Number of families	2
Number of comparisons per family	28
Alpha	0.05
Tukey's multiple comparisons test	Mean Diff,	95,00% CI of diff,	Significant?	Summary	Adjusted P Value
+ Cis
PBST vs. 10	-0.915	-1,987 to 0,1571	No	ns	0.1251
PBST vs. 20	-1.88	-2,952 to -0,8079	Yes	***	0.0003
PBST vs. 30	-2.015	-3,087 to -0,9429	Yes	***	0.0002
PBST vs. 50	-2.315	-3,387 to -1,243	Yes	****	<0,0001
PBST vs. 82	-2.85	-3,922 to -1,778	Yes	****	<0,0001
PBST vs. 120	-6	-7,072 to -4,928	Yes	****	<0,0001
PBST vs. 145	-7.185	-8,257 to -6,113	Yes	****	<0,0001
10 vs. 20	-0.965	-2,037 to 0,1071	No	ns	0.0942
10 vs. 30	-1.1	-2,172 to -0,02794	Yes	*	0.0422
10 vs. 50	-1.4	-2,472 to -0,3279	Yes	**	0.0065
10 vs. 82	-1.935	-3,007 to -0,8629	Yes	***	0.0002
10 vs. 120	-5.085	-6,157 to -4,013	Yes	****	<0,0001
10 vs. 145	-6.27	-7,342 to -5,198	Yes	****	<0,0001
20 vs. 30	-0.135	-1,207 to 0,9371	No	ns	0.9998
20 vs. 50	-0.435	-1,507 to 0,6371	No	ns	0.8425
20 vs. 82	-0.97	-2,042 to 0,1021	No	ns	0.0915
20 vs. 120	-4.12	-5,192 to -3,048	Yes	****	<0,0001
20 vs. 145	-5.305	-6,377 to -4,233	Yes	****	<0,0001
30 vs. 50	-0.3	-1,372 to 0,7721	No	ns	0.9728
30 vs. 82	-0.835	-1,907 to 0,2371	No	ns	0.1929
30 vs. 120	-3.985	-5,057 to -2,913	Yes	****	<0,0001
30 vs. 145	-5.17	-6,242 to -4,098	Yes	****	<0,0001
50 vs. 82	-0.535	-1,607 to 0,5371	No	ns	0.6714
50 vs. 120	-3.685	-4,757 to -2,613	Yes	****	<0,0001
50 vs. 145	-4.87	-5,942 to -3,798	Yes	****	<0,0001
82 vs. 120	-3.15	-4,222 to -2,078	Yes	****	<0,0001
82 vs. 145	-4.335	-5,407 to -3,263	Yes	****	<0,0001
120 vs. 145	-1.185	-2,257 to -0,1129	Yes	*	0.025
- Cis
PBST vs. 10	-0.79	-1,862 to 0,2821	No	ns	0.2426
PBST vs. 20	-1.78	-2,852 to -0,7079	Yes	***	0.0006
PBST vs. 30	-1.225	-2,297 to -0,1529	Yes	*	0.0195
PBST vs. 50	-2.22	-3,292 to -1,148	Yes	****	<0,0001
PBST vs. 82	-2.32	-3,392 to -1,248	Yes	****	<0,0001
PBST vs. 120	-1.765	-2,837 to -0,6929	Yes	***	0.0007
PBST vs. 145	-2.185	-3,257 to -1,113	Yes	****	<0,0001
10 vs. 20	-0.99	-2,062 to 0,08206	No	ns	0.0815
10 vs. 30	-0.435	-1,507 to 0,6371	No	ns	0.8425
10 vs. 50	-1.43	-2,502 to -0,3579	Yes	**	0.0054
10 vs. 82	-1.53	-2,602 to -0,4579	Yes	**	0.0029
10 vs. 120	-0.975	-2,047 to 0,09706	No	ns	0.0889
10 vs. 145	-1.395	-2,467 to -0,3229	Yes	**	0.0067
20 vs. 30	0.555	-0,5171 to 1,627	No	ns	0.6333
20 vs. 50	-0.44	-1,512 to 0,6321	No	ns	0.8352
20 vs. 82	-0.54	-1,612 to 0,5321	No	ns	0.6619
20 vs. 120	0.015	-1,057 to 1,087	No	ns	>0,9999
20 vs. 145	-0.405	-1,477 to 0,6671	No	ns	0.8831
30 vs. 50	-0.995	-2,067 to 0,07706	No	ns	0.0791
30 vs. 82	-1.095	-2,167 to -0,02294	Yes	*	0.0435
30 vs. 120	-0.54	-1,612 to 0,5321	No	ns	0.6619
30 vs. 145	-0.96	-2,032 to 0,1121	No	ns	0.097
50 vs. 82	-0.1	-1,172 to 0,9721	No	ns	>0,9999
50 vs. 120	0.455	-0,6171 to 1,527	No	ns	0.8122
50 vs. 145	0.035	-1,037 to 1,107	No	ns	>0,9999
82 vs. 120	0.555	-0,5171 to 1,627	No	ns	0.6333
82 vs. 145	0.135	-0,9371 to 1,207	No	ns	0.9998
120 vs. 145	-0.42	-1,492 to 0,6521	No	ns	0.8636
Test details	Mean 1	Mean 2	Mean Diff,	SE of diff,	N1	N2	q	DF
+ Cis
PBST vs. 10	0	0.915	-0.915	0.3097	2	2	4.179	16
PBST vs. 20	0	1.88	-1.88	0.3097	2	2	8.586	16
PBST vs. 30	0	2.015	-2.015	0.3097	2	2	9.203	16
PBST vs. 50	0	2.315	-2.315	0.3097	2	2	10.57	16
PBST vs. 82	0	2.85	-2.85	0.3097	2	2	13.02	16
PBST vs. 120	0	6	-6	0.3097	2	2	27.4	16
PBST vs. 145	0	7.185	-7.185	0.3097	2	2	32.81	16
10 vs. 20	0.915	1.88	-0.965	0.3097	2	2	4.407	16
10 vs. 30	0.915	2.015	-1.1	0.3097	2	2	5.024	16
10 vs. 50	0.915	2.315	-1.4	0.3097	2	2	6.394	16
10 vs. 82	0.915	2.85	-1.935	0.3097	2	2	8.837	16
10 vs. 120	0.915	6	-5.085	0.3097	2	2	23.22	16
10 vs. 145	0.915	7.185	-6.27	0.3097	2	2	28.64	16
20 vs. 30	1.88	2.015	-0.135	0.3097	2	2	0.6166	16
20 vs. 50	1.88	2.315	-0.435	0.3097	2	2	1.987	16
20 vs. 82	1.88	2.85	-0.97	0.3097	2	2	4.43	16
20 vs. 120	1.88	6	-4.12	0.3097	2	2	18.82	16
20 vs. 145	1.88	7.185	-5.305	0.3097	2	2	24.23	16
30 vs. 50	2.015	2.315	-0.3	0.3097	2	2	1.37	16
30 vs. 82	2.015	2.85	-0.835	0.3097	2	2	3.814	16
30 vs. 120	2.015	6	-3.985	0.3097	2	2	18.2	16
30 vs. 145	2.015	7.185	-5.17	0.3097	2	2	23.61	16
50 vs. 82	2.315	2.85	-0.535	0.3097	2	2	2.443	16
50 vs. 120	2.315	6	-3.685	0.3097	2	2	16.83	16
50 vs. 145	2.315	7.185	-4.87	0.3097	2	2	22.24	16
82 vs. 120	2.85	6	-3.15	0.3097	2	2	14.39	16
82 vs. 145	2.85	7.185	-4.335	0.3097	2	2	19.8	16
120 vs. 145	6	7.185	-1.185	0.3097	2	2	5.412	16
- Cis
PBST vs. 10	0	0.79	-0.79	0.3097	2	2	3.608	16
PBST vs. 20	0	1.78	-1.78	0.3097	2	2	8.129	16
PBST vs. 30	0	1.225	-1.225	0.3097	2	2	5.595	16
PBST vs. 50	0	2.22	-2.22	0.3097	2	2	10.14	16
PBST vs. 82	0	2.32	-2.32	0.3097	2	2	10.6	16
PBST vs. 120	0	1.765	-1.765	0.3097	2	2	8.061	16
PBST vs. 145	0	2.185	-2.185	0.3097	2	2	9.979	16
10 vs. 20	0.79	1.78	-0.99	0.3097	2	2	4.521	16
10 vs. 30	0.79	1.225	-0.435	0.3097	2	2	1.987	16
10 vs. 50	0.79	2.22	-1.43	0.3097	2	2	6.531	16
10 vs. 82	0.79	2.32	-1.53	0.3097	2	2	6.988	16
10 vs. 120	0.79	1.765	-0.975	0.3097	2	2	4.453	16
10 vs. 145	0.79	2.185	-1.395	0.3097	2	2	6.371	16
20 vs. 30	1.78	1.225	0.555	0.3097	2	2	2.535	16
20 vs. 50	1.78	2.22	-0.44	0.3097	2	2	2.01	16
20 vs. 82	1.78	2.32	-0.54	0.3097	2	2	2.466	16
20 vs. 120	1.78	1.765	0.015	0.3097	2	2	0.06851	16
20 vs. 145	1.78	2.185	-0.405	0.3097	2	2	1.85	16
30 vs. 50	1.225	2.22	-0.995	0.3097	2	2	4.544	16
30 vs. 82	1.225	2.32	-1.095	0.3097	2	2	5.001	16
30 vs. 120	1.225	1.765	-0.54	0.3097	2	2	2.466	16
30 vs. 145	1.225	2.185	-0.96	0.3097	2	2	4.384	16
50 vs. 82	2.22	2.32	-0.1	0.3097	2	2	0.4567	16
50 vs. 120	2.22	1.765	0.455	0.3097	2	2	2.078	16
50 vs. 145	2.22	2.185	0.035	0.3097	2	2	0.1598	16
82 vs. 120	2.32	1.765	0.555	0.3097	2	2	2.535	16
82 vs. 145	2.32	2.185	0.135	0.3097	2	2	0.6166	16
120 vs. 145	1.765	2.185	-0.42	0.3097	2	2	1.918	16

[truncated: 1 more sheets: Figure S7]
